1 **Divergent strategies to reduce stomatal pore index during water deficit in perennial**  
2 **angiosperms**

3

4 Noel Anthony Mano, Santiago Franco Lopez, and Michael V. Mickelbart

5

6 Department of Botany & Plant Pathology and Center for Plant Biology, Purdue University, 915  
7 W. State St., West Lafayette, IN 47907

8

9 Author for correspondence: *Michael V. Mickelbart*, Tel: +1 765-494-7902, Email:

10 [mickelbart@purdue.edu](mailto:mickelbart@purdue.edu)

11

12 **ORCID IDs**

13

14 Noel Mano <https://orcid.org/0000-0001-6872-349X>

15 Santiago Franco <https://orcid.org/0000-0002-6487-9929>

16 Michael Mickelbart <https://orcid.org/0000-0001-5939-3126>

17

18 **Word counts**

19 ☐ Summary: 186

20 ☐ Introduction: 970

21 ☐ Materials and methods: 1610

22 ☐ Results: 1257

23 ☐ Discussion: 2611

24 ☐ Conclusions: 237

25 ☐ Total: 6692

26

27 **Figures and supporting information**

28 ☐ Number of figures: 5

29 ☐ Number of color figures: 4

30 ☐ Number of supporting information files: 1

31

32 **Summary**

33

34 ☐ Modulation of stomatal development may be an acclimation response to low water  
35 availability. However, stomatal development plasticity has been assessed in very few species.

36 ☐ We quantified leaf anatomy traits, including stomatal index (SI), density (SD), size (SS), and  
37 pore index (SPI), in response to water-deficit stress in river birch (*Betula nigra* L.), eastern  
38 redbud (*Cercis canadensis* L.), and silver maple (*Acer saccharinum* L.).

39 ☐ Birch and redbud, but not maple, had reduced SPI in response to water deficit. The  
40 mechanism by which SPI reduction occurred (via SD or SS) varied among species and with  
41 severity of water stress. Despite reduced SPI in birch and redbud, anatomical changes were  
42 relatively small and had a minor to no effect on the theoretical maximum stomatal conductance.  
43 Furthermore, gas-exchange rates were equivalent to well-watered plants following media re-  
44 irrigation.

45 ☐ In some tree species, stomatal development is downregulated in response to water deficit  
46 conditions. Stomatal development plasticity is facilitated by smaller or fewer stomata, depending  
47 upon the species and the intensity of the stress. Water-deficit-induced plasticity in stomatal  
48 development is species-specific, likely due to species adaptation to ecological niches.

49

50 **Key words: gas exchange, leaf anatomy, stomatal conductance, stomatal development,**  
51 **stomatal development plasticity, vein development, water stress.**

## 52 **Introduction**

53           Understanding plant acclimation and adaptation to water deficit will become increasingly  
54 important as climate change increases the frequency and intensity of drought. Drought events are  
55 projected to increase in frequency globally, and in the US Midwest in particular, from once every  
56 five years to once every other year by 2050 (Jin *et al.*, 2018). In natural ecosystems, drought  
57 events result in reduced ecosystem productivity (Wu *et al.*, 2011) and plant mortality (Gitlin *et*  
58 *al.*, 2006; Klos *et al.*, 2009). Reduced water availability constrains CO<sub>2</sub> assimilation and reduces  
59 carbon provisioning from shoots to roots (Ruehr *et al.*, 2009). Drought events may decrease tree  
60 water potentials to below the zero-carbon assimilation point (Breshears *et al.*, 2009), which can  
61 deplete tree carbon reserves and result in tree death (McDowell, 2011). Although there is  
62 evidence for large-scale ecosystem resilience to dynamic seasonal availability of water (Ponce-  
63 Campos *et al.*, 2013), the role of leaf hydrological plasticity in achieving these acclimations is  
64 unclear.

65           The capacity of stomata to regulate water loss during periods of water deficit is critical to  
66 plant growth and survival. Stomatal closure is an important transitory response during drought  
67 events, but during chronic water deficit, modulation of stomatal anatomy may also be important  
68 for water conservation (Liu *et al.*, 2018). Smaller stomata close more quickly in response to  
69 decreased leaf hydration status than larger stomata (Drake *et al.*, 2013; Giday *et al.*, 2013) and  
70 smaller guard cells are biomechanically optimized to open at lower turgor pressure (Spence *et*  
71 *al.*, 1986) but without increased carbon costs (Raven, 2014) enabling maintenance of CO<sub>2</sub>  
72 assimilation during water-stress events.

73           In dicotyledonous plants, stomatal development primarily occurs during early leaf  
74 emergence, when developing leaves are composed of dividing and differentiating stem cells  
75 (Rawson & Craven, 1975; Andriankaja *et al.*, 2012), although the specific timing of development  
76 varies among species (Woodall *et al.*, 1998). Stomatal differentiation can occur late in leaf  
77 development in some species (Ludlow, 1991), and there is some evidence for the persistence of  
78 meristemoids that can form new stomata late in leaf development (Geisler *et al.*, 2000). Within  
79 the first two days of leaf emergence, leaf veins form (Kang & Dengler, 2004) and vein density is  
80 subsequently modulated by passive dilution during leaf expansion (Carins Murphy *et al.*, 2012).  
81 Based on this developmental timing, environmental effects on the ultimate anatomy of a leaf are  
82 likely to occur early in the development of that leaf. A stress occurring during the expansionary

83 phase of leaf development may result in changes in stomatal density due to altered cell turgor  
84 and therefore cell size, but the relative numbers of guard cells to pavement cells is unlikely to be  
85 significantly altered because cell identity is mostly fixed by this stage. This illustrates the  
86 difficulty in drawing conclusions on mechanistic responses to diverse environments from  
87 ecological experiments, such as those involving stands of trees that receive different precipitation  
88 levels (Reyer *et al.*, 2013), since it is difficult to ascertain when a water deficit event occurs  
89 relative to leaf development.

90 Stomatal development is sensitive to environmental cues at the cellular level, particularly  
91 light (Casson *et al.*, 2009; Kang *et al.*, 2009) and CO<sub>2</sub> (Woodward, 1987; McElwain & Chaloner,  
92 1995; Franks & Beerling, 2009), suggesting that the modulation of stomatal development is an  
93 acclimation trait. The expression of several genes that regulate stomatal development are  
94 downregulated in response to osmotic stress (Kilian *et al.*, 2007; Harb *et al.*, 2010; Yoo *et al.*,  
95 2010; Baerenfaller *et al.*, 2012; Kumari *et al.*, 2014; Yoo *et al.*, 2019), and have been linked to a  
96 concomitant suppression of stomatal development in *Arabidopsis* (Skirycz *et al.*, 2011; Kumari  
97 *et al.*, 2014; Yoo *et al.*, 2019) and soybean (Tripathi *et al.*, 2016). Similar gene expression  
98 patterns may exist in tree species, but very few data have been collected (Hamanishi *et al.*, 2012;  
99 Viger *et al.*, 2016).

100 Despite these observed links between water deficit and stomatal plasticity at the  
101 anatomical and molecular levels, plasticity of SI, stomatal density (SD), and stomatal size (SS) in  
102 response to water deficit varies widely among (de Silva *et al.*, 2012; Hamanishi *et al.*, 2012) and  
103 within (Pääkkönen *et al.*, 1998; Hovenden & Vander Schoor, 2012) tree species. Between-  
104 species variation may be explained by different degrees and methods of water deficit imposed by  
105 different authors, such as withholding water over a period of time (Hamanishi *et al.*, 2012) or  
106 different degrees of maintained media water content (de Silva *et al.*, 2012; Aasamaa *et al.*, 2001;  
107 Catoni *et al.*, 2017). Within-species differences in stomatal development plasticity could be  
108 caused by different provenances having different stomatal patterning as an adaptation to local  
109 levels of moisture (Dunlap & Stettler, 2001; Pearce *et al.*, 2006, McKown *et al.*, 2014).

110 Stomatal pore index (SPI, Sack *et al.*, 2003) and theoretical maximum stomatal  
111 conductance ( $g_{smax}$ , Franks & Farquhar, 2001) are derived traits that combine the frequency and  
112 dimensions of stomata to describe the effective potential water loss from the leaf interior, which  
113 effectively predicts leaf gas exchange (Dow *et al.*, 2014; McElwain *et al.*, 2016). These traits

114 account for all the possible changes in stomatal anatomy that could occur in producing leaves  
115 optimized for water conservation. For example, simply reporting a lack of SD plasticity may  
116 omit the production of smaller stomata that leads to reduced SPI and/or  $g_{smax}$ . Since SPI and  $g_{smax}$   
117 are frequently not reported, conclusions cannot yet be drawn about the role of stomatal  
118 development plasticity in facilitating water deficit tolerance in trees.

119 We hypothesized that perennial species exposed to persistent water-deficit stress  
120 acclimate via a reduction in stomatal development and overall stomatal coverage to minimize  
121 water loss. We examined three tree species: *Betula nigra* L., *Acer saccharinum* L., and *Cercis*  
122 *canadensis* L., chosen to represent the Betulaceae, Sapindaceae, and Fabaceae families,  
123 respectively. These species occupy a large range of urban, rural, and forested land across  
124 temperate North America.

125

## 126 **Materials and methods**

127

### 128 Plant materials and growth conditions

129

130 One-year-old bare-root river birch (*Betula nigra* L.) were planted in 8.5 L containers, and  
131 four-week-old redbud (*Cercis canadensis* L.) and silver maple (*Acer saccharinum* L.) seedlings  
132 were planted in 3.4 L containers in a BM8 Berger soilless substrate (Berger, Saint-Modeste, QC,  
133 Canada). Plants were maintained in a greenhouse in the Purdue Horticulture Plant Growth  
134 Facility from June to December 2018. A minimum 14 h photoperiod was provided with 100-watt  
135 high-pressure sodium lamps. Temperature and relative humidity were measured using two  
136 HOBO® data loggers (Onset Computer Corporation, Bourne, MA, USA), and the daily light  
137 integral was quantified with an external weather station (Fig. S1). Average day and night  
138 temperatures were 24.7 and 23.6°C, respectively, and average relative humidity (RH) was 70%.  
139 Vapor pressure deficit (VPD, kPa) was calculated as

140

$$141 \quad \text{VPD (kPa)} = \left(1 - \frac{\text{RH}}{100}\right) \times \text{SVP} \quad \text{Eqn 1}$$

142

143 where SVP is the saturated vapor pressure at a given daily temperature, derived from standard  
144 tables of the two quantities.

145 Two experiments were performed, the first imposing a mild stress, and the second  
146 imposing a more severe stress. Media water content (MWC) was maintained by weighing plants  
147 and replacing water on a regular basis to 100 or 60% MWC (experiment 1), and 100 or 40%  
148 MWC (experiment 2) of the initial saturated weight (including initial plant biomass) and was  
149 calculated as

150

$$\text{MWC (\%)} = \frac{\text{MW}}{\text{MSW}} \times 100 \quad \text{Eqn 2}$$

151

152 where MW is the weight of the container system (consisting of container, media, and plant) on a  
153 given day, and MSW is the saturated weight of the container system at the beginning of the  
154 experiment. For the first experiment, plants were irrigated to media capacity until establishment.  
155 After 95 d post-planting, water was withheld for 18 d until the target MWC of 60% was reached  
156 in the water-stressed (WS) treatment plants. Control well-watered (WW) plants were irrigated  
157 every 3–4 d as necessary, and WS plants every 24 h to 60% of their initial saturated weight (Fig.  
158 S2). In the second experiment, plants were irrigated to media capacity until establishment and  
159 after 54 d, WS was initiated. WW plants were irrigated every 2 d, and WS plants were irrigated  
160 every day (redbuds) or 2 d (maples) to 40% of their initial saturated weight (Fig. S2). Birch was  
161 not included in the 40% MWC treatment.

162 Acidified water was supplemented with water-soluble fertilizer (ICL Specialty Fertilizers,  
163 Dublin, OH, USA) to provide the following (in mg L<sup>-1</sup>): 150 N, 9.8 P, 119 K, 12 Mg, 21 S, 1.5  
164 Fe, 0.4 Mn and Zn, 0.2 Cu and B, and 0.1 Mo. Nitrate and ammonium sources of nitrogen were  
165 provided as 61 and 39% total N, respectively. Irrigation water was supplemented with 93%  
166 sulfuric acid (Brenntag, Reading, PA, USA) at 0.08 mL L<sup>-1</sup> to reduce alkalinity to 100 mg L<sup>-1</sup>  
167 and pH to a range of 5.8 to 6.2.

168

169 Measurements

170

171 Leaves that emerged after experimental days 20 and 34 in experiments 1 and 2,  
172 respectively, following the establishment of treatment MWC levels, were used for data collection  
173 (Fig. S3; Table S1). To quantify leaf development in experiment 1, leaf 2 was photographed next

174 to a ruler with a digital camera *c.* every two days over 40 d and leaf area (LA) was quantified  
175 using ImageJ software (National Institutes of Health, Bethesda, MD, USA). A logistic curve was  
176 fit to the leaf area *A* at time *t* for each leaf (Fig. S4a–c):

$$177$$
$$178 \quad A \text{ (cm}^2\text{)} = A_{\text{max}} / [1 + e^{(\alpha - \kappa t)}] \quad \text{Eqn 3}$$
$$179$$

180 where  $\alpha$  is the sigmoidal midpoint and  $\kappa$  is the logistic growth rate. The logistic curve was  
181 linearized and used to calculate the maximum leaf growth rate, experimental day on which the  
182 leaf reached 50% full expansion, and the number of days to full leaf expansion (Fig. S4d–f).

183 To confirm that leaves used for data collection were fully expanded, LA was assessed in  
184 leaves 2 (Fig. S4) and 4 in experiment 1. In experiment 2, the size of one leaf that had developed  
185 after the initiation of water deficit was measured over 7 days prior to harvest to ensure full  
186 expansion of this leaf. Final LA was quantified during the final destructive harvest, by removing  
187 the leaf and imaging against a white background.

188 Net CO<sub>2</sub> assimilation (*A*, μmol CO<sub>2</sub> m<sup>-2</sup> s<sup>-1</sup>), stomatal conductance (*g<sub>s</sub>*, mol H<sub>2</sub>O m<sup>-2</sup> s<sup>-1</sup>)  
189 and transpiration (*E*, mmol H<sub>2</sub>O m<sup>-2</sup> s<sup>-1</sup>) were measured using a portable gas-exchange analyzer  
190 (LI-6400XT; LI-COR Biosciences, Lincoln, NE, USA). Chamber conditions during  
191 measurements were 1800 μmol m<sup>-2</sup> s<sup>-1</sup> PAR, air temperature range of 29.0–32.8°C, and average  
192 VPD was 2.5 ± 0.4 kPa.

193 After scanning the leaf used for gas exchange measurements, a segment of leaf, including  
194 a portion of the midrib and petiole, was collected, weighed to obtain the fresh weight (FW) and  
195 placed into a 50 mL conical tube with 25 mL of water. After the leaf had been immersed for *c.* 8  
196 h, the leaf was blotted dry and weighed to obtain the turgid weight (TW). The leaf was then dried  
197 at 45°C to a constant weight to obtain the dry weight (DW). The relative water content (RWC)  
198 was calculated as

$$199$$
$$200 \quad \text{RWC (\%)} = \left[ \frac{(\text{FW} - \text{DW})}{(\text{TW} - \text{DW})} \right] 100. \quad \text{Eqn 4}$$
$$201$$

202 This portion of the leaf was also scanned for LA, from which the specific leaf weight was  
203 calculated as

204

205 
$$SLW \text{ (mg cm}^{-2}\text{)} = \frac{DW}{RWC LA}. \quad \text{Eqn 5}$$

206

207 Osmotic potential was measured on the same leaves used for RWC. A leaf segment was  
208 removed, placed into an Eppendorf tube with a Costar Spin-X insert (Corning Incorporated,  
209 Corning, NY, USA), and immersed in liquid nitrogen. Samples were stored at -20°C. To extract  
210 cell sap, samples were thawed in sealed tubes for 5 min and then centrifuged for 5 min at 120  
211 RPM x 100. Osmolality of a 10 µL of volume of cell sap was measured using a vapor pressure  
212 osmometer (VAPRO 5520; Wescor Inc., Logan, UT, USA). Osmolality was converted to  
213 osmotic potential ( $\Psi_{\pi}$ ) as

214

$$\Psi_{\pi} \text{ (MPa)} = -C_s RT \quad \text{Eqn 6}$$

215

216 where  $C_s$  is osmolality, R is the gas constant, and T is temperature. The osmotic potential at full  
217 turgor ( $\Psi_{\pi 100}$ ) was calculated as

218

219 
$$\Psi_{\pi 100} \text{ (MPa)} = \Psi_{\pi} (RWC/100). \quad \text{Eqn 7}$$

220

221 Epidermal traits were quantified from leaf impressions made on microscope slides using  
222 cyanoacrylate (Duro Super Glue; Henkel, Düsseldorf, Germany). Four images were taken from  
223 each impression with a DCM 900 microscope CMOS Camera (Oplenic Optronics, Hangzhou,  
224 China) of a 0.03 mm<sup>2</sup> area, under 400X magnification using a light microscope (BH-2; Olympus,  
225 Tokyo, Japan). All three species are hypostomatous, so epidermal impressions were made only  
226 on the abaxial side of leaves. The number of stomata (SD) and pavement (PD) cells per unit area,  
227 and stomatal size (SS), equivalent to the area within the outer edges of the guard cell, was  
228 determined using ImageJ software. Only whole stomata and pavement cells bordering the top  
229 and right sides of each image were counted. Stomatal index (SI) was calculated as

230

$$SI \text{ (\%)} = \left[ \frac{\text{Number of stomata}}{\text{(Number of stomata + Number of epidermal cells)}} \right] \times 100. \quad \text{Eqn 8}$$

231



232 Pavement cell size was estimated by dividing the number of pavement cells counted in a region  
233 and dividing by the size of the visual field (30 000  $\mu\text{m}^2$ ).

234

235 Stomatal size was calculated using the formula for an ellipse:

236

$$\text{SS } (\mu\text{m}^2) = \pi \times \frac{\text{Stomatal length}}{2} \times \frac{\text{Stomatal width}}{2}. \quad \text{Eqn 9}$$

237

238 Stomatal pore index (SPI) was calculated as (Liu *et al.*, 2018)

239

$$\text{SPI } (\%) = [\text{SS} \times \text{SD}]100. \quad \text{Eqn 10}$$

241

242 Theoretical maximum conductance ( $g_{smax}$ ) was calculated using the equation developed by  
243 Franks & Farquhar (2001)

244

$$g_{smax} \text{ (mol m}^{-2}\text{s}^{-1}) = \frac{d \text{ SD } a_{max}}{v \left( l + \frac{\pi}{2} \right) \sqrt{\frac{a_{max}}{\pi}}} \quad \text{Eqn 11}$$

245

246 where  $d$  is the diffusivity of water in air (0.0000249  $\text{m}^2 \text{ s}^{-1}$  at 25°C),  $v$  is the molar volume of air  
247 (0.0224  $\text{m}^3 \text{ mol}^{-1}$ ),  $l$  is the stomatal pore depth equivalent to the width of a fully turgid guard cell,  
248 and  $a_{max}$  is the maximum pore area, calculated using half the stomatal length as the pore length,  
249 as follows:

$$a_{max} \text{ } (\mu\text{m}^2) = \pi \times \frac{\text{Stomatal length}}{4} \times \frac{\text{Stomatal width}}{4}. \quad \text{Eqn 12}$$

250

251 To quantify vein density (VD), the same leaf section from leaves 3–4 (experiment 1) and  
252 1 (experiment 2) used for epidermal impressions was submerged in 50% sodium hypochlorite in  
253 a water bath at 50°C for 6 h. After the leaf was cleared, it was placed in a 0.0015% toluidine blue  
254 solution for 12 h, then observed under 40X magnification. Four images were taken per sample,  
255 each covering an area of 2.95  $\text{mm}^2$  and avoiding the midvein of the leaf. Major and minor veins  
256 in the image were traced and the total length summed across all orders of veins. This sum was

257 then divided by the area of the image to calculate VD as mm veins mm<sup>-2</sup>. Images were processed  
258 using ImageJ software.

259

260 Statistical analysis

261

262 Experiments were conducted using a completely randomized design. In the first  
263 experiment, several measurements were made on multiple leaves from the same plant, and it was  
264 therefore analyzed as a repeated measures ANOVA. The leaf-treatment interaction was used to  
265 determine which leaves could be pooled for a given trait. Data was pooled across leaves if the  
266 interaction of treatment groups and leaves was not significant ( $P > 0.05$ ). Regardless of pooling,  
267 each WS group was compared against the comparable control group by one-way ANOVA. Data  
268 were transformed with a Box-Cox transformation if needed to fulfill the assumption of  
269 normality. To calculate plasticity of anatomical traits, the natural logarithm of the response ratio  
270 was determined as  $\ln(\text{average of treatment group}/\text{average of control group})$ , with the standard  
271 deviation of WW and WS groups combined to calculate the 95% confidence interval. A single  
272 leaf per plant was examined in the second experiment. All analyses were conducted in Jamovi  
273 v1.

274

## 275 **Results**

276

277 Plant growth and water status were adversely affected by water deficit

278

279 To verify the effects of the imposed WS, we quantified plant growth. Under WS, all trees  
280 were shorter than WW trees (Figs S5a, S6) and all trees produced smaller leaves except redbud,  
281 in which leaf size was not affected by 60% MWC (Figs S5b, S7). The 60% MWC treatment  
282 resulted in a reduced maximum leaf growth rate in all species (Fig. S4d), whereas the length of  
283 leaf development was longer only in maple leaves (Fig. S4e, f).

284 To assess treatment effects on plant water content, we quantified several water relations  
285 traits. Restricting MWC to 60% resulted in lower leaf RWC during the stress period, but this  
286 quickly recovered to WW levels following re-saturation of the media (Fig. S8). However, in the  
287 40% MWC treatment, reduced RWC was observed in maple, but not redbud leaves (Fig. S8b, c).

288 The 60% MWC WS level did not induce a reduction in osmotic potential ( $\Psi_{\pi}$ ) in any species,  
289 whereas  $\Psi_{\pi}$  was lower in maple and redbud leaves on trees grown under 40% MWC (Fig.  
290 S9a–c). In redbud leaves, this appears to be a passive effect, as  $\Psi_{\pi 100}$  was not reduced (Fig. S9f).

291

292 Water deficit resulted in plasticity of stomatal anatomy and leaf physiology

293

294 In these experiments, we quantified changes in leaf anatomy and physiology of three  
295 temperate tree species in response to WS. The plasticity of the various traits depended on species  
296 and the intensity of the water deficit treatment. Here we describe these changes for each of the  
297 five treatment combinations, relative to WW plants.

298 Under WS, birch trees produced leaves that were 45% smaller than WW leaves (Figs  
299 S5b, S7a), with similar leaf thickness (Fig. S10). Stomatal density was unchanged (Figs 1a,  
300 S11a) despite the production of 22% fewer stomata relative to the total cell population (Figs 1b,  
301 S12a). This is because stomata in WS leaves were 20% smaller (Figs 1c, S13a), primarily due to  
302 a decrease in stomatal length (as opposed to width) (Fig. S14a, d). Pavement cells were 26%  
303 smaller (Fig. S15a, b), so cell density of both types was unchanged (Fig. S16a, b), leading to the  
304 same stomatal distribution per unit area in all leaves. However, the smaller stomata in WS leaves  
305 resulted in a 17% lower SPI (Figs 1d, S17a). Despite the 20% reduction in SS, birch did not  
306 exhibit plasticity for  $g_{smax}$  (Fig. 2a, b). There was no reduction in VD in WS birch leaves (Figs 3,  
307 S18a).

308 Under WS conditions,  $g_s$  was reduced by 90% in leaf 3 (in which  $g_{smax}$  was reduced) and  
309 76% in leaf 4 (in which  $g_{smax}$  was unchanged) (Fig. 4a). During the water deficit stress,  $A$  was  
310 also 99 and 68% lower (Fig. 4d) and transpiration rate was reduced by 84 and 67% (Fig. S19a) in  
311 birch leaves 3 and 4, respectively. Due to stomatal closure, reduced SPI and smaller leaf size,  
312 WS birch leaves lost 85% less water during the water-deficit period (Fig. S19d).  $g_s$  and  $A$   
313 eventually recovered to levels comparable to WW leaves seven days after media re-saturation  
314 (Figs 4a, d). Despite the smaller LA and SS, whole-leaf transpiration also recovered to WW  
315 levels in this time frame (Fig. S19d). It is possible that such a recovery could occur because in  
316 leaf 4 SPI was not different in WW and WS leaves (Fig. S17a), and the size of WS leaf 4 was not  
317 as reduced as previously developed leaves (Fig. S7a).

318 In response to 60% MWC, maple leaves were 48% smaller (Figs S5b, S7b) and 18%  
319 thinner (Fig. S10) than WW leaves. However, epidermal anatomy was mostly non-plastic, with  
320 no change in SS, SI, or SD (Figs 1, S11b, S12b, S13b). There was also no change in pavement  
321 cell size (Fig. S15a, c) or density (Fig. S16a, c). As a result, neither SPI nor  $g_{smax}$  were lower in  
322 WS leaves (Figs 1d, 2a, c, S17b). Maple leaf VD was also unchanged under 60% MWC (Figs 3,  
323 S18b).

324 Despite the lack of anatomical plasticity,  $g_s$  and  $A$  were 83% lower overall in WS leaves,  
325 relative to WW leaves (Fig. 4b, e). Maple WS leaves 3 and 4 grown under 60% MWC had  
326 reduced  $g_s$ ,  $A$ , and  $E$  of 90 and 77% (Fig. 4b), 87 and 80% (Fig. 4e), and 78 and 72% (Fig. S19b),  
327 respectively. Due to stomatal closure and smaller leaf size, WS maple leaves lost 88% less water  
328 during the water-deficit period (Fig. S19e).  $A$  and  $E$  eventually recovered to levels comparable to  
329 WW leaves three days after media re-saturation (Figs 4e, S19b). Due to the smaller leaf size and  
330 stomatal closure, WS leaves lost 88% less water, relative to WW leaves, and whole-leaf  
331 transpiration was still depressed in WS leaves at the end of the recovery period (Fig. S19e).

332 Under the severe 40% MWC WS, maple leaves were 77% smaller (Figs S5, S7b) with no  
333 change in leaf thickness (Fig. S10). Due to a reduction in length (Fig. S14b), stomata in WS  
334 leaves were 13% smaller than those of WW leaves (Figs 1c, S13b). As in the 60% MWC  
335 treatment, no changes in stomatal anatomy occurred (Figs 1, 2, S11b, S12b, S17b). However,  
336 there was a 24% increase in VD (Figs 3, S18b). The 40% MWC WS resulted in a 50, 71, and  
337 42% reduction in  $g_s$ ,  $A$ , and  $E$ , respectively (Fig. S20a–c). Overall, 40% MWC WS maple leaves  
338 lost 85% less water than WW leaves (Fig. S20d).

339 Redbud trees produced leaf types depending on the intensity of the WS treatment. Under  
340 the 60% MWC WS, redbud leaves were not smaller (Figs S5b, S7c), but they were 11% thinner  
341 (Fig. S10). There was no change in SS (Figs 1c, S13c, S14c, f), but SI was reduced by 10% (Figs  
342 1b, S12c). Because epidermal cell size and density were unchanged (Figs S15a, d; S16a, d), this  
343 decrease in stomatal development resulted in a 20% decrease in SD (Figs 1a, S11c). With fewer  
344 stomata in redbud leaves, SPI and  $g_{smax}$  were reduced by 20% (Figs 1d, 2a, d, 17c). Vein density  
345 was not different between WS and WW leaves (Figs 3, S18c).

346 Under the 60% MWC WS,  $g_s$  was reduced by 87% in leaf 3 and 72% in leaf 4 (Fig. 4c),  
347 as both leaves had reduced  $g_{smax}$ .  $A$  was also 86 and 61% lower during the water deficit period in  
348 these leaves (Fig. 4f).  $E$  was 85 and 67% lower (Fig. S19c). Although LA was unchanged,

349 stomatal closure and lower SD resulted in WS redbud leaves losing 75% less water during the  
350 water-deficit period (Fig. S19f). Despite reduced SD and  $g_{smax}$  in leaf 4,  $g_s$ ,  $A$ ,  $E$ , and whole-leaf  
351 transpiration eventually recovered to levels comparable to WW redbud leaves three days after  
352 root zone re-saturation (Figs 4c, f; S19c, f).

353 By contrast, the severe (40% MWC) WS resulted in smaller redbud leaves (Figs S5b,  
354 S7c), but SLW was similar in WW and WS leaves (Fig. S10). In this case, redbud stomata were  
355 23% smaller (Figs 1c, S13c), because of both shorter and narrower guard cell dimensions (Fig.  
356 S14c, f). Despite SI being reduced by 12% in these leaves (Figs 1b, S12c), SD was unchanged  
357 (Figs 1a, 11c). Because of smaller stomata, SPI was reduced by 25% (Figs 1d, S17c), but this  
358 was not sufficient to reduce  $g_{smax}$  (Fig. S2a, d). However,  $g_s$  and  $A$  were reduced (by 85 and 88%,  
359 respectively, Fig. S20a, b). Overall, the smaller LA and SS, as well as stomatal closure, meant  
360 that 40% MWC WS redbud leaves lost 93% less water than WW leaves (Fig. S20c, d).

361

## 362 **Discussion**

363

### 364 Effects of water stress on tree growth and development

365

366 Water-deficit treatments resulted in shorter trees in all species and smaller leaves in  
367 almost all species and treatments (Figs S5–S7). Similar to previous studies, birch LA was  
368 reduced with only a small effect on plant size under the mild stress we applied (Kleczewski *et*  
369 *al.*, 2012). In maple and redbud, the severe 40% MWC treatment resulted in a more dramatic  
370 reduction in growth compared to the 60% MWC treatment (Fig. S5).

371 Increased leaf thickness under water deficit conditions may increase the diffusion path  
372 from the leaf interior to the environment, thereby minimizing water loss from leaves (Syvertsen  
373 *et al.*, 1995; Sobrado, 2007). As noted in previous studies (Kleczewski *et al.*, 2012), there was no  
374 change in leaf thickness of river birch leaves in response to drought stress. Both increases and  
375 decreases in water-deficit-induced leaf thickness have been reported in related species *B. ermanii*  
376 (Kitao *et al.*, 2003; Tabata *et al.*, 2010) and *B. pendula* (Possen *et al.*, 2011; Aspelmeier &  
377 Leuschner, 2006). Genotypes of *Cercis canadensis* adapted to drier regions have thicker leaves  
378 than those adapted to wetter regions (Donselman & Flint, 1982; Abrams, 1988; Tipton & White,  
379 1995; Fritsch *et al.*, 2018), but there are no reports of temporal water-deficit events on leaf

380 thickness in redbud. In the present study, redbud leaves were thinner in response to the 60%  
381 MWC and were unchanged in response to the 40% MWC treatment, and the same pattern existed  
382 in maple. Decreased water availability also resulted in thinner leaves in related species *A.*  
383 *truncatum* (Li *et al.*, 2017) and *A. davidii* (Guo *et al.*, 2019). Our data show that the reduction in  
384 leaf thickness that occurs under the mild stress is not enhanced by the more severe water deficit.  
385 In redbud and maple, thinner leaves may be produced in response to mild water deficit to allow  
386 for easier hydration of the leaf. It is unclear why this response would not exist under more severe  
387 stress.

388         Decreasing water availability results in decreased RWC in tree species (Reddy *et al.*,  
389 2004) and experimental treatments that drastically reduce water availability can result in  
390 extremely low RWC (Ma *et al.*, 2015; Vieira *et al.*, 2017). In this study, RWC was reduced by  
391 approximately 12% overall during the water deficit periods (Fig. S8). This relatively small  
392 decrease in RWC is likely due to the fact that although water was reduced in the WS treatments,  
393 small amounts of water were delivered on a regular basis, as opposed to a long-term dry-down  
394 (de Silva *et al.*, 2012; Catoni *et al.*, 2017). In all species, RWC increased to control levels shortly  
395 after irrigation of the WS plants, as has been observed previously when an imposed water deficit  
396 did not severely reduce leaf RWC (Tognetti *et al.*, 1995). In this way, our water deficit treatment  
397 mimicked the type of stress encountered by trees in periods with reduced precipitation compared  
398 to wet periods (Kubiske & Abrams, 1991; Backes & Leuschner, 2000). This established that our  
399 experiments tested acclimation responses as they may arise in natural drought conditions, rather  
400 than leaf responses to rapid dehydration.

401         Some tree species are able to adjust osmotically in response to water deficit episodes  
402 (Ranney *et al.*, 1991; Wang & Stutte, 1992), whereas other species show no evidence of osmotic  
403 adjustment (OA) under water deficit conditions (Tschaplinski *et al.*, 1995). The observed  
404 maintenance of high RWC in WS leaves generally occurred without OA. In the 60% MWC  
405 treatment, there was no evidence for OA in any species (Fig. S9d–f). Redbud accumulates  
406 soluble carbohydrates in response to WS, but apparently do not osmotically adjust, as shown in  
407 the current and past (Griffin *et al.*, 2004) experiments. The only evidence we found of OA was in  
408 40% MWC maple (Fig. S9e). This OA under only severe WS has been observed in *Fraxinus*  
409 *excelsior* (Guicherd *et al.*, 1997) and hybrid *Populus* genotypes (Gebre *et al.*, 1998). However,  
410 this did not affect the water status or growth of leaves, as both species produced smaller leaves

411 (Figs S5, S7), and maple leaves still had reduced RWC despite the OA (Fig. S8b). Altogether,  
412 the growth and water relations response to WS was similar across silver maple, river birch, and  
413 eastern redbud leaves.

414

415 Stomatal development plasticity in trees via different mechanisms to a common outcome

416

417 Stomatal closure in response to WS is a common response (Loewenstein & Pallardy,  
418 1998; Bréda *et al.*, 2006). However, the plasticity of stomatal anatomy in leaves that emerge  
419 under water-deficit conditions is far less studied, especially in a manner that integrates different  
420 stomatal traits to show the final overall change in stomatal anatomy across the leaf epidermis. It  
421 is likely that this anatomical plasticity plays some role in acclimation to water deficit, since the  
422 molecular basis for stomatal development plasticity in response to water deficit has been  
423 established in some tree species (Hamanishi *et al.*, 2012; Viger *et al.*, 2016).

424 Reduced SPI in response to water deficit has been demonstrated in some tree species  
425 (Gindell, 1969; Camposeo *et al.*, 2011), but is not the typical response in trees (unpublished meta-  
426 analysis; Aasamaa *et al.*, 2001; Luo *et al.*, 2007; Eksteen *et al.* 2013) due to no anatomical  
427 changes occurring or the fact that the often-observed reduction in SS is not sufficient to have an  
428 impact on SPI (Aasamaa *et al.*, 2001; Luo *et al.*, 2007; Machado *et al.*, 2010; de Silva *et al.*,  
429 2012; Hovenden *et al.*, 2012; Eksteen *et al.*, 2013; Catoni *et al.*, 2017). However, it is clear from  
430 our study that some tree species do respond to water deficit stress via stomatal development  
431 plasticity. In birch and redbud, we observed a common outcome of reduced SPI, but the basis of  
432 SPI plasticity differed between the species and stress severity. Under the 60% MWC treatment,  
433 birch stomata were smaller, whereas redbud leaves had fewer stomata. Under the 40% MWC  
434 treatment, redbud leaves instead had smaller stomata. Water-deficit-induced reductions in SD  
435 (Pääkkönen *et al.*, 1998; Silva, *et al.*, 2009; Camposeo *et al.*, 2011; Rajabpoor *et al.*, 2014) and  
436 SS (Luo *et al.*, 2007; Maes *et al.*, 2009) have been noted in other tree species. Many of these  
437 studies were conducted in dry regions and/or dry-adapted species, but in this study we show that  
438 these mechanisms of stomatal development plasticity also exist in temperate North American  
439 species adapted to more mesic environments.

440 The response to WS by maple leaves is more reflective of the broader literature on  
441 stomatal anatomy plasticity. This lack of stomatal development plasticity may be because

442 maintenance of existing stomatal (and thus gas-exchange) capacity is advantageous for post-  
443 drought recovery, and because transient responses to water deficit, such as stomatal closure or  
444 solute accumulation, can be easily reversed, whereas anatomical changes to leaves are  
445 permanent. Still, the fact that there is a molecular basis and empirical data for stomatal anatomy  
446 plasticity in tree species suggests a potential acclimation/adaptive role.

447         The basis of SPI variation differs among species even under WW conditions. In WW  
448 birch and redbud leaves, higher SPI was a product of higher SD and SS (Fig. S21 a, c), but in  
449 maple leaves, higher SPI was due to larger stomata (Fig. S21b). Because SPI was correlated with  
450 stomatal frequency and size in WW and WS leaves, it appears that different tree species allocate  
451 a similar epidermal allocation of stomatal pore area (similar range of SPI in all three species, Fig.  
452 S21) differently via alteration of SS and/or SD. Silver maple leaves appear to have evolved to  
453 maintain a minimal range of small stomata while maximizing SPI via SD (Franks *et al.*, 2009).  
454 Maintaining small stomata as SPI variation is dependent on variation in SD would also minimize  
455 the cost associated with opening stomata (Spence *et al.*, 1986; Raven *et al.*, 2014), while  
456 maximizing the benefit (potential conductance or  $g_{smax}$ ) obtained by increasing SD (de Boer *et*  
457 *al.*, 2016). Redbud WS leaves also had a relatively tight range of small stomata, but exhibited  
458 SPI variation via a much broader range of SD (Fig S21c).

459         It appears that the components of SPI are subject to independent mechanisms of  
460 plasticity, resulting in different anatomical mechanisms to a common outcome (Fig. 5). Firstly,  
461 passive control of guard cell size is evident in birch WS leaves because both cell types were  
462 smaller in WS leaves (birch, Figs 1, S13a, S15a, b) and pavement cell size and SS were  
463 positively correlated (Fig. S22a, c). Passive control of stomatal size, whereby guard cell  
464 dimensions are a function of cell turgor, probably result in a mechanical advantage frequently  
465 ascribed to smaller stomata (Spence *et al.*, 1986), and thus is favored under WS conditions.  
466 Under WW conditions, SS could be actively controlled to respond to other environmental  
467 factors, such as light.

468         Redbud WW and WS leaves exhibited differential coordination of stomatal and pavement  
469 cell size (Fig. S22c), raising the possibility of different mechanisms controlling stomatal size in  
470 response to changing environmental conditions. Previous work in *Arabidopsis* has demonstrated  
471 that pavement and guard cell size develop differently during leaf growth due to differential  
472 regulation of cell growth (Asl *et al.*, 2011).



473           The WS-induced changes in stomatal traits appear to be elicited by different mechanisms  
474 in the different species. Specifically, we observed that decreases in birch SI, SS, and SPI were  
475 correlated with decreased leaf RWC (Fig. S23). Additionally, since guard and pavement cells  
476 were smaller in birch leaves (Figs 1c, S13a, S15a, b), stomatal trait plasticity may be primarily  
477 turgor-driven in this species. This response in birch leaves may be due to a reduced RWC-  
478 induced accumulation of abscisic acid in drought-stressed leaves (Sack *et al.*, 2018). The  
479 sensitivity of stomatal and leaf development pathways to ABA accumulation may be more  
480 pronounced in certain species such as birch via variation in expression, copy number, or protein  
481 homology of the genes involved in ABA signaling and leaf cell development.

482           Vein density is often higher in more drought-tolerant species or genotypes, often coupled  
483 with reduced LA (Scoffoni *et al.*, 2011; Nardini *et al.*, 2012), which may enable leaf hydration  
484 during drought conditions, as embolized veins can be bypassed through additional venation  
485 (Sack *et al.*, 2008). Although our VD data was similar to prior values for related species (Sellin  
486 *et al.*, 2012; Uhl & Mosbrugger, 1999), VD was similar in WW and WS leaves (Figs 3, S18). In  
487 a variety of species, Aasamaa *et al.* (2001) also found VD to be similarly non-plastic. Maple  
488 leaves grown under 40% MWC were the only case in which VD increased in response to water  
489 deficit (Figs 3. S18b), possibly as part of the overall response in which there was no change in  
490 stomatal development or SPI. This may suggest that only a severe water deficit necessitates a  
491 change in water supply to leaves, but this response may itself be absent if leaf water demand is  
492 reduced by other anatomical plasticity such as lower SPI in redbud leaves. Fiorin *et al.* (2016)  
493 propose that the mean stomata-vein distance imposes a limit on the density of stomata that can be  
494 adequately supplied water by leaf venation. With this in mind, the reduction of leaf thickness (in  
495 the mild stress) and stomatal or vein plasticity may have been sufficient to keep leaf tissue and  
496 the associated stomata hydrated.

497           The coordination of stomatal and vein development has been described as the balance  
498 between water demand and supply in leaves (Brodribb & Jordan, 2011; Schneider *et al.*, 2017).  
499 To achieve a high rate of gas exchange, a high SD must be matched with high VD (Fiorin *et al.*,  
500 2016), which has often been demonstrated in the correlation between SD and VD (Carins  
501 Murphy *et al.*, 2012; Carins Murphy *et al.*, 2016). In *T. ciliata*, this relationship was found to  
502 persist even after imposition of a low humidity treatment (Carins Murphy *et al.*, 2014). Although  
503 maple leaves did not exhibit stomatal development plasticity in response to WS, SD was

504 nevertheless coordinated with VD in the range of SD across WW and WS leaves (Fig. S24b).  
505 Vein density also increased in 40% MWC maple leaves (Fig. S18b), and it is unlikely that this  
506 was simply due to smaller leaves under this treatment, as SD did not similarly increase (Figs 1a,  
507 S11b). Thus, WS maple leaves may produce additional venation to maintain the positive SD-VD  
508 correlation (Carins Murphy *et al.*, 2014). Furthermore, the SD-VD relationship was distinct in  
509 redbud and birch WS versus WW leaves (Fig. S24). Although SD-VD coordination has been  
510 proposed as a critical factor in the evolution of angiosperms (Boyce *et al.*, 2009; Zhang *et al.*,  
511 2012), it is nonetheless absent in several woody angiosperm species (Torre *et al.*, 2003; Zhao *et*  
512 *al.*, 2016).

513

514 Impact of stomatal development plasticity on leaf physiology

515

516 Water deficit results in stomatal closure, and thus reduced  $g_s$  and  $A$  in leaves of river  
517 birch (Ranney *et al.*, 1991), eastern redbud (Abrams, 1988; Griffin *et al.*, 2004) and related  
518 maple species (Bauerle *et al.*, 2003). Stomatal closure is sometimes observed in conjunction with  
519 stomatal plasticity (Cavender-Bares *et al.*, 2007; Eksteen *et al.*, 2013). In a diverse panel of  
520 gymnosperms, ferns, and angiosperms, McElwain *et al.* (2016) showed that as the anatomical  
521 capacity for gas exchange increases, the operational rate of gas exchange also increases.  
522 However, in this study, gas exchange was not strongly dependent on stomatal anatomy. In birch  
523 and redbud, but not maple leaves, stomatal development was positively correlated with  $A$  and  $g_s$   
524 (Fig. S25). However, many other stomatal anatomical traits were not correlated with gas  
525 exchange, and especially critically, neither SPI nor  $g_{smax}$  were correlated with  $g_s$  (data not  
526 shown). The lack of a clear link between stomatal anatomy and gas exchange during drought  
527 conditions has previously been reported in a variety of species (Pääkkönen *et al.*, 1998; Carins  
528 Murphy *et al.*, 2014; Vieira *et al.*, 2017; Toscano *et al.*, 2018) Based on these reports and the  
529 present data set, we propose that among tree species, stomatal traits are only partially responsible  
530 for leaf physiology during water deficit episodes.

531 Plasticity in SPI was frequently not accompanied by plasticity in  $g_{smax}$  (Figs 1a, 2), with  
532 only redbud leaves under 60% MWC exhibiting a decrease in both traits. Other instances of  
533 reduced SPI, such as birch leaves under 60% MWC and redbud leaves under 40% MWC, were  
534 not accompanied by a decrease in  $g_{smax}$ . Reducing leaf SPI but maintaining  $g_{smax}$  thus minimizes

535 stomatal production and operating costs while maximizing carbon assimilation gains, which is  
536 especially important in water-stressed leaves. Moreover, maintenance of  $g_{smax}$  would enable rapid  
537 return to normal  $g_s$  after restoration of water-sufficient conditions, especially if a similar overall  
538 anatomy of water-stressed leaves now comprises smaller stomata that can be opened more easily.  
539 Because most species, including those from the present dataset, show operational  $g_s$  as a very  
540 low fraction of  $g_{smax}$ , (Fig. S26; McElwain *et al.*, 2016), the reduction of  $g_{smax}$  in 60% MWC  
541 redbud leaves would have little to no impact on redbud recovery, and indeed this was observed  
542 in redbud following root-zone re-saturation (Fig. 4c, f).

543         Instead of a balance between stomatal costs and benefits, it may be the case that stomatal  
544 anatomy under water-deficit conditions is directed towards facilitating stomatal closure. None of  
545 the anatomical traits that control the dimensions and overall area of stomata for gas exchange  
546 (SD, SS, SPI,  $g_{smax}$ ) were correlated with operational  $A$  or  $g_s$ . Instead, in all three species, the area  
547 coverage of stomata was correlated with the degree of stomatal closure observed during the  
548 stress period (Fig. S27). Thus, lower SPI reduced the degree of stomatal closure necessary during  
549 the WS period. Although not typically discussed in these terms, we propose that stomatal  
550 developmental inhibition is aimed towards achieving minimum  $g_s$ , without constraining  
551 maximum  $g_s$ .

552

## 553 **Conclusions**

554

555         A common outcome of reduced SPI is achieved by some North American tree species via  
556 different mechanisms in response to water deficit (Fig. 5). These species and treatment-level  
557 differences illustrate the importance of reporting all stomatal traits in leaf anatomical plasticity  
558 studies. For instance, although SS or SD was reduced in some *Eucalyptus grandis* clones under  
559 certain water-deficit treatments, SPI calculated from these values was almost always unchanged  
560 (Eksteen *et al.*, 2013). A similar effect was observed in certain *Prunus dulcis* ecotypes: reduced  
561 SPI was the result of either smaller or fewer stomata, so presenting these traits in isolation would  
562 have missed this phenotypic plasticity (Camposeo *et al.*, 2011). In all three species across both  
563 treatment levels, examining stomatal frequency and size, as well as the combinations of these  
564 traits via SPI and  $g_{smax}$ , was critical to the conclusions drawn. Had SD or SS been examined in  
565 isolation, the different mechanisms of plasticity between birch and redbud at 60% MWC would

566 have not been revealed. Similarly, the differential response in redbud leaves grown at 60% or  
567 40% MWC would have also been missed. We could also deduce that reduced  $g_s$  in WS maple  
568 (and the fourth leaf of WS birch) was due primarily to reduced stomatal aperture, since there  
569 were no changes in the total coverage of stomata in these leaves, despite the smaller stomata  
570 produced in these leaves under the 40% MWC treatment (Figs 1c, S13).

571

## 572 **Acknowledgements**

573

574 We thank James McKenna for plant material; Nathan Deppe and Dan Little for greenhouse  
575 assistance; Mike Gosney, Amanda Ávila Cardoso, and Huangai Bi for assistance with data  
576 collection; Robert Heath for assistance with leaf growth analysis; Scott McAdam and Chris  
577 Oakley for suggestions on methodology and manuscript advice; Peter Goldsbrough for helpful  
578 edits to the manuscript; Tom Kronewitter of Purdue University Agricultural Communication for  
579 the production of Figure 5; and the Purdue University Center for Plant Biology for funding.

580

## 581 **Author contributions**

582

583 NAM and MVM designed the experiment; NAM and SFL performed all greenhouse work and  
584 data collection; NAM and MVM analyzed the data; NAM, SFL, and MVM wrote the  
585 manuscript.

586

## 587 **References**

588

589 **Aasamaa K, Söber A, Rahi M. 2001.** Leaf anatomical characteristics associated with shoot  
590 hydraulic conductance, stomatal conductance and stomatal sensitivity to changes of leaf water  
591 status in temperate deciduous trees. *Australian Journal of Plant Physiology* **28**: 765–774.

592

593 **Abrams MD. 1988.** Genetic variation in leaf morphology and plant and tissue water relations  
594 during drought in *Cercis canadensis* L. *Forest Science* **34**: 200–207.

595

596 **Andriankaja M, Dhondt S, De Bodt S, Vanhaeren H, Coppens F, De Milde L,**  
597 **Mühlenbrock P, Skirycz A, Gonzalez N, Beemster GTS, et al. 2012.** Exit from proliferation  
598 during leaf development in *Arabidopsis thaliana*: a not-so-gradual process. *Developmental Cell*  
599 **22:** 64–78.  
600

601 **Asl LK, Dhondt S, Boudolf V, Beemster GTS, Beeckman T, Inzé D, Govaerts W, De**  
602 **Veylder L. 2011.** Model-based analysis of *Arabidopsis* leaf epidermal cells reveals distinct  
603 division and expansion patterns for pavement and guard cells. *Plant Physiology* **156:** 2172 –  
604 2183.  
605

606 **Aspelmeier S, Leuschner C. 2006.** Genotypic variation in drought response of silver birch  
607 (*Betula pendula* Roth): leaf and root morphology and carbon partitioning. *Trees* **20:** 42–52.  
608

609 **Backes K, Leuschner C. 2000.** Leaf water relations of competitive *Fagus sylvatica* and *Quercus*  
610 *petraea* trees during 4 years differing in soil drought. *Canadian Journal of Forest Research* **30:**  
611 335–346.  
612

613 **Baerenfaller K, Massonnet C, Walsh S, Baginsky S, Bühlmann P, Hennig L, Hirsch–**  
614 **Hoffmann M, Howell KA, Kahlau S, Radziejwoski et al. 2012.** Systems-based analysis of  
615 *Arabidopsis* leaf growth reveals adaptation to water deficit. *Molecular Systems Biology* **8:** 606.  
616

617 **Bauerle WL, Dudley JB, Grimes LW. 2003.** Genotypic variability in photosynthesis, water  
618 use, and light absorption among red and Freeman maple cultivars in response to drought stress.  
619 *Journal of the American Society for Horticultural Science* **128:** 337–342.  
620

621 **Boyce CK, Brodribb TJ, Feild TS, Zwieniecki MA. 2009.** Angiosperm leaf vein evolution was  
622 physiologically and environmentally transformative. *Proceedings of the Royal Society B* **276:**  
623 1771–1776.  
624

- 625 **Bréda N, Huc R, Granier A, Dreyer E. 2006.** Temperate forest trees and stands under severe  
626 drought: a review of ecophysiological responses, adaptation processes and long-term  
627 consequences. *Annals of Forest Science* **63**: 625–644.  
628
- 629 **Breshears DD, Myers OB, Meyer CW, Barnes FJ, Zou CB, Allen CD, McDowell NG,**  
630 **Pockman WT. 2009.** Tree die-off in response to global change-type drought: mortality insights  
631 from a decade of plant water potential measurements. *Frontiers in Ecology and the Environment*  
632 **7**: 185–189.  
633
- 634 **Brodribb TJ, Jordan GJ. 2011.** Water supply and demand remain balanced during leaf  
635 acclimation of *Nothofagus cunninghamii* trees. *New Phytologist* **192**: 437–448.  
636
- 637 **Camposeo S, Palasciano M, Vivaldi GA, Godini A. 2011.** Effect of increasing climatic water  
638 deficit on some leaf and stomatal parameters of wild and cultivated almonds under  
639 Mediterranean conditions. *Scientia Horticulturae* **127**: 234–241.  
640
- 641 **Carins Murphy MR, Jordan GJ, Brodribb TJ. 2012.** Differential leaf expansion can enable  
642 hydraulic acclimation to sun and shade. *Plant, Cell and Environment* **35**: 1407–1418.  
643
- 644 **Carins Murphy MR, Jordan GJ, Brodribb TJ. 2014.** Acclimation to humidity modifies the  
645 link between leaf size and the density of veins and stomata. *Plant, Cell and Environment* **37**:  
646 124–131.  
647
- 648 **Carins Murphy MR, Jordan GJ, Brodribb TJ. 2016.** Cell expansion not cell differentiation  
649 predominantly co-ordinates veins and stomata within and among herbs and woody angiosperms  
650 grown under sun and shade. *Annals of Botany* **118**: 1127–1138.  
651
- 652 **Casson SA, Franklin KA, Gray JE, Grierson CS, Whitlam GC, Hetherington AM. 2009.**  
653 Phytochrome B and *PIF4* regulate stomatal development in response to light quantity. *Current*  
654 *Biology* **19**: 229–234.  
655

656 **Catoni R, Gratani L, Bracco F, Granata MU. 2017.** How water supply during leaf  
657 development drives water stress response in *Corylus avellana* saplings. *Scientia Horticulturae*  
658 **214**: 122–132.

659

660 **Cavender-Bares J, Sack L, Savage J. 2007.** Atmospheric and soil drought reduce nocturnal  
661 conductance in live oaks. *Tree Physiology* **27**: 611–620.

662

663 **de Boer HJ, Price CA, Wagner-Cremer, Dekker SC, Franks PJ, Veneklaas EJ. 2016.**  
664 Optimal allocation of leaf epidermal area for gas exchange. *New Phytologist* **210**: 1219–1228.

665

666 **de Silva NDG, Cholewa E, Ryser P. 2012.** Effects of combined drought and heavy metal  
667 stresses on xylem structure and hydraulic conductivity in red maple (*Acer rubrum* L.). *Journal of*  
668 *Experimental Botany* **63**: 5957–5966.

669

670 **Donselman HM, Flint HL. 1982.** Genecology of eastern redbud (*Cercis canadensis*). *Ecology*  
671 **63**: 962–971.

672

673 **Dow GJ, Bergmann CD, Berry JA. 2014.** An integrated model of stomatal development and  
674 leaf physiology. *New Phytologist* **201**: 1218–1226.

675

676 **Drake PL, Froend RH, Franks PJ. 2013.** Smaller, faster stomata: scaling of stomatal size, rate  
677 of response, and stomatal conductance. *Journal of Experimental Botany* **64**: 495–505.

678

679 **Dunlap JM, Stettler RF. 2001.** Variation in leaf epidermal and stomatal traits of *Populus*  
680 *trichocarpa* from two transects across the Washington Cascades. *Canadian Journal of Botany*  
681 **79**: 528–536.

682

683 **Eksteen AB, Grzeskowiak V, Jones NB, Pammenter NW. 2013.** Stomatal characteristics of  
684 *Eucalyptus grandis* clonal hybrids in response to water stress. *Southern Forests* **75**: 105–111.

685

686 **Fiorin L, Brodribb TJ, Anfodillo T. 2016.** Transport efficiency through uniformity:  
687 organization of veins and stomata in angiosperm leaves. *New Phytologist* **209**: 216–227.  
688

689 **Franks PJ, Farquhar GD. 2001.** The effect of exogenous abscisic acid on stomatal  
690 development, stomatal mechanics, and leaf gas exchange in *Tradescantia virginiana*. *Plant*  
691 *Physiology* **125**: 935–942.  
692

693 **Franks PJ, Beerling DJ. 2009.** Maximum leaf conductance driven by CO<sub>2</sub> effects on stomatal  
694 size and density over geologic time. *Proceedings of the National Academy of Sciences, USA*  
695 **106**: 10343–10347.  
696

697 **Franks PJ, Drake PL, Beerling DJ. 2009.** Plasticity in maximum stomatal conductance  
698 constrained by negative correlation between stomatal size and density: an analysis using  
699 *Eucalyptus globulus*. *Plant, Cell & Environment* **32**: 1737–1748.  
700

701 **Fritsch PW, Nowell CF, Leatherman LST, Gong W, Cruz BC, Burge DO, Delgado-Salinas**  
702 **A. 2018.** Leaf adaptations and species boundaries in North American *Cercis*: implications for the  
703 evolution of dry floras. *American Journal of Botany* **105**: 1577–1594.  
704

705 **Gebre GM, Tschaplinski TJ, Tuskan GA, Todd DE. 1998.** Clonal and seasonal differences in  
706 leaf osmotic potential and organic solutes of five hybrid poplar clones grown under field  
707 conditions. *Tree Physiology* **18**: 645–652.  
708

709 **Geisler M, Nadeau J, Sack FD. 2000.** Oriented asymmetric divisions that generate the stomatal  
710 spacing pattern in *Arabidopsis* are disrupted by the *too many mouths* mutation. *The Plant Cell*  
711 **12**: 2075–2086.  
712

713 **Giday H, Kjaer KH, Fanourakis D, Ottosen C-O. 2013.** Smaller stomata require less severe  
714 leaf drying to close: a case study in *Rosa hybrida*. *Journal of Plant Physiology* **170**: 1309–1316.  
715



- 716 **Gindel I. 1969.** Stomatal number and size as related to soil moisture in tree xerophytes in Israel.  
717 *Ecology* **50**: 263–267.  
718
- 719 **Gitlin AR, Sthultz CM, Bowker MA, Stumpf S, Paxton KL, Kennedy K, Muñoz A, Bailey**  
720 **JK, Whitham TG. 2006.** Mortality gradients within and among dominant plant populations as  
721 barometers of ecosystem change during extreme drought. *Conservation Biology* **20**: 1477–1486.  
722
- 723 **Griffin JJ, Ranney TG, Pharr DM. 2004.** Heat and drought influence photosynthesis, water  
724 relations, and soluble carbohydrates of two ecotypes of redbud (*Cercis canadensis*). *Journal of*  
725 *the American Society for Horticultural Science* **129**: 497–502.  
726
- 727 **Guicherd P, Peltier JP, Gout E, Bligny R, Marigo G. 1997.** Osmotic adjustment in *Fraxinus*  
728 *excelsior* L.: malate and mannitol accumulation in leaves under drought conditions. *Trees* **11**:  
729 157–161.  
730
- 731 **Guo X, Luo Y-J, Xu Z-W, Li M-Y, Guo W-H. 2019.** Response strategies of *Acer davidii* to  
732 varying light regimes under different water conditions. *Flora* **257**: 151423.  
733
- 734 **Hamanishi ET, Thomas BR, Campbell MM. 2012.** Drought induces alterations in the stomatal  
735 development program in *Populus*. *Journal of Experimental Botany* **63**: 4959–4971.  
736
- 737 **Harb A, Krishnan A, Ambavaram MMR, Pereira A. 2010.** Molecular and physiological  
738 analysis of drought stress in *Arabidopsis* reveals early responses leading to acclimation in plant  
739 growth. *Plant Physiology* **154**: 1254–1271.  
740
- 741 **Hovenden MJ, Vander Schoor JK. 2012.** Soil water potential does not affect leaf morphology  
742 or cuticular characters important for palaeo-environmental reconstructions in southern beech,  
743 *Nothofagus cunninghamii* (Nothofagaceae). *Australian Journal of Botany* **60**: 87–95.  
744

- 745 **Hovenden MJ, Vander Schoor JK, Osanai Y. 2012.** Relative humidity has dramatic impacts  
746 on leaf morphology but little effect on stomatal index or density in *Nothofagus cunninghamii*  
747 (*Nothofagaceae*). *Australian Journal of Botany* **60**: 700–706.
- 748
- 749 **Jin Z, Ainsworth EA, Leakey ADB, Lobell DB. 2018.** Increasing drought and diminishing  
750 benefits of elevated carbon dioxide for soybean yields across the US Midwest. *Global Change*  
751 *Biology* **24**: e522–e533.
- 752
- 753 **Kang C-Y, Lian H-L, Wang F-F, Huang J-R, Yang H-Q. 2009.** Cryptochromes,  
754 phytochromes, and COP1 regulate light-controlled stomatal development in *Arabidopsis*. *The*  
755 *Plant Cell* **21**: 2624–2641.
- 756
- 757 **Kang J, Dengler N. 2004.** Vein pattern development in adult leaves of *Arabidopsis thaliana*.  
758 *International Journal of Plant Sciences* **165**: 231–242.
- 759
- 760 **Kilian J, Whitehead D, Horak J, Wanke D, Weinl S, Batistic O, D’Angelo C, Bornberg-**  
761 **Bauer E, Kudla J, Harter K. 2007.** The AtGenExpress global stress expression data set:  
762 protocols, evaluation and model data analysis of UV–B light, drought and cold stress responses.  
763 *Plant Journal* **50**: 347–363.
- 764
- 765 **Kitao M, Lei TT, Koike T, Tobita H, Maruyama Y. 2003.** Higher electron transport rate  
766 observed at low intercellular CO<sub>2</sub> concentration in long-term drought-acclimated leaves of  
767 Japanese mountain birch (*Betula ermanii*). *Physiologia Plantarum* **118**: 406–413.
- 768
- 769 **Kleczewski NM, Herms DA, Pierluigi B. 2012.** Nutrient and water availability alter  
770 belowground patterns of biomass allocation, carbon partitioning, and ectomycorrhizal abundance  
771 in *Betula nigra*. *Trees* **26**: 525–533.
- 772
- 773 **Klos RJ, Wang GG, Bauerle WL, Rieck JR. 2009.** Drought impact on forest growth and  
774 mortality in the southeast USA: an analysis using Forest Health and Monitoring data. *Ecological*  
775 *Applications* **19**: 699–708.

776

777 **Kubiske ME, Abrams MD. 1991.** Rehydration effects on pressure-volume relationships in four  
778 temperate woody species: variability with site, time of season and drought conditions. *Oecologia*  
779 **85:** 537–542.

780

781 **Kumari A, Jewaria PK, Bergmann DC, Kakimoto T. 2014.** Arabidopsis reduces growth  
782 under osmotic stress by decreasing SPEECHLESS protein. *Plant & Cell Physiology* **55:** 2037–  
783 2046.

784

785 **Li L, Wang X, Niu J, Cui J, Zhang Q, Wan W, Liu B. 2017.** Effects of elevated atmospheric  
786 O<sub>3</sub> concentrations on early and late leaf growth and elemental contents of *Acer truncatum* Bung  
787 under mild drought. *Acta Ecologica Sinica* **37:** 31–34.

788

789 **Liu C, He N, Zhang J, Li Y, Wang Q, Sack L, Yu G. 2018.** Variation of stomatal traits from  
790 cold temperate to tropical forests and association with water use efficiency. *Functional Ecology*  
791 **32:** 20–28.

792

793 **Loewenstein NJ, Pallardy SG. 1998.** Drought tolerance, xylem sap abscisic acid and stomatal  
794 conductance during soil drying: a comparison of canopy trees of three temperate deciduous  
795 angiosperms. *Tree Physiology* **18:** 431–439.

796

797 **Ludlow AE. 1991.** *Ochna pulchra* Hook: leaf growth and development related to photosynthetic  
798 activity. *Annals of Botany* **68:** 527–540.

799

800 **Luo HJ, Zheng ZB, Luo S, Pan YS, Liu XH. 2007.** Changes in leaf characters of loquat under  
801 repeated drought stresses. *Acta Horticulturae* **750:** 417–422.

802

803 **Ma P, Bai T-H, Ma F-W. 2015.** Effects of progressive drought on photosynthesis and  
804 partitioning of absorbed light in apple trees. *Journal of Integrative Agriculture* **14:** 681–690.

805

- 806 **Machado AV, de Souza TV, Paulilo MTS, Santos M. 2010.** Response of a woody species from  
807 Atlantic rain forest, *Hedyosmum brasiliense* Mart. ex Miq. (Chloranthaceae), submitted to water  
808 stress. *Insula* **39**: 01–13.
- 809
- 810 **Maes WH, Achten WMJ, Reubens B, Raes D, Samson R, Muys B. 2009.** Plant–water  
811 relationships and growth strategies of *Jatropha curcas* L. seedlings under different levels of  
812 drought stress. *Journal of Arid Environments* **73**: 877–884.
- 813
- 814 **McDowell NG. 2011.** Mechanisms linking drought, hydraulics, carbon metabolism, and  
815 vegetation mortality. *Plant Physiology* **155**: 1051–1059.
- 816
- 817 **McElwain JC, Chaloner WG. 1995.** Stomatal density and index of fossil plants track  
818 atmospheric carbon dioxide in the Palaeozoic. *Annals of Botany* **76**: 389–395.
- 819
- 820 **McElwain JC, Yiotis C, Lawson T. 2016.** Using modern plant trait relationships between  
821 observed and theoretical maximum stomatal conductance and vein density to examine patterns of  
822 plant macroevolution. *New Phytologist* **209**: 94–103.
- 823
- 824 **McKown AD, Guy RD, Quamme L, Klápště J, La Mantia J, Constabel CP, El-Kassaby  
825 YA, Hamelin RC, Zifkin M, Azam MS. 2014.** Association genetics, geography and  
826 ecophysiology link stomatal patterning in *Populus trichocarpa* with carbon gain and disease  
827 resistance trade-offs. *Molecular Ecology* **23**: 5771–5790.
- 828
- 829 **Nardini A, Pedà G, La Rocca N. 2012.** Trade-offs between leaf hydraulic capacity and drought  
830 vulnerability: morpho-anatomical bases, carbon costs and ecological consequences. *New  
831 Phytologist* **196**: 788–798.
- 832
- 833 **Pääkkönen E, Vahala J, Pohjola M, Holopainen T, Kärenlampi L. 1998.** Physiological,  
834 stomatal and ultrastructural ozone responses in birch (*Betula pendula* Roth.) are modified by  
835 water stress. *Plant, Cell and Environment* **21**: 671–684.
- 836

- 837 **Pearce DW, Millard S, Bray DF, Rood SB. 2006.** Stomatal characteristics of riparian poplar  
838 species in a semi-arid environment. *Tree Physiology* **26**: 211–218.
- 839
- 840 **Ponce-Campos GE, Moran MS, Huete A, Zhang Y, Bresloff C, Huxman TE, Eamus D,**  
841 **Bosch DD, Buda AR, Gunter SA, et al. 2013.** Ecosystem resilience despite large-scale altered  
842 hydroclimatic conditions. *Nature* **494**: 349–352.
- 843
- 844 **Possen BJHM, Oksanen E, Rousi M, Ruhanen H, Ahonen V, Tervahauta A, Heinonen J,**  
845 **Heiskanen J, Kärenlampi S, Vapaavuori E. 2011.** Adaptability of birch (*Betula pendula* Roth)  
846 and aspen (*Populus tremula* L.) genotypes to different soil moisture conditions. *Forest Ecology*  
847 *and Management* **262**: 1387–1399.
- 848
- 849 **Rajabpoor S, Kiani S, Sorkheh K, Tavakoli F. 2014.** Changes induced by osmotic stress in the  
850 morphology, biochemistry, physiology, anatomy and stomatal parameters of almond species  
851 (*Prunus* L. spp.) grown *in vitro*. *Journal of Forestry Research* **25**: 523–534.
- 852
- 853 **Ranney TG, Bassuk NL, Whitlow TH. 1991.** Osmotic adjustment and solute constituents in  
854 leaves and roots of water-stressed cherry (*Prunus*) trees. *Journal of the American Society for*  
855 *Horticultural Science* **116**: 684–688.
- 856
- 857 **Raven JA. 2014.** Speedy small stomata? *Journal of Experimental Botany* **6**: 1415–1424.
- 858
- 859 **Rawson HM, Craven CL. 1975.** Stomatal development during leaf expansion in tobacco and  
860 sunflower. *Australian Journal of Botany* **23**: 253–261.
- 861
- 862 **Reddy AR, Chaitanya KV, Vivekanandan M. 2004.** Drought-induced responses of  
863 photosynthesis and antioxidant metabolism in higher plants. *Journal of Plant Physiology* **161**:  
864 1189–1202.
- 865

- 866 **Reyer CPO, Leuzinger S, Rammig A, Wolf A, Bartholomeus RP, Bonfante A, de Lorenzi F,**  
867 **Dury M, Gloning P, Abou Jaoudé R, et al. 2013.** A plant's perspective of extremes: terrestrial  
868 plant responses to changing climatic variability. *Global Change Biology* **19**: 75–89.  
869
- 870 **Ruehr NK, Offermann CA, Gessler A, Winkler JB, Ferrio JP, Buchmann N, Barnard RL.**  
871 **2009.** Drought effects on allocation of recent carbon: from beech leaves to soil CO<sub>2</sub> efflux. *New*  
872 *Phytologist* **184**: 950–961.  
873
- 874 **Sack L, Cowan PD, Jaikumar N, Holbrook NM. 2003.** The ‘hydrology’ of leaves: co-  
875 ordination of structure and function in temperate woody species. *Plant, Cell and Environment*  
876 **26**: 1343–1356.  
877
- 878 **Sack L, Dietrich EM, Streeter CM, Sánchez-Gómez D, Holbrook NM. 2008.** Leaf palmate  
879 venation and vascular redundancy confer tolerance of hydraulic disruption. *Proceedings of the*  
880 *National Academy of Sciences, USA* **105**: 1567–1572.  
881
- 882 **Sack L, John GP, Buckley TN. 2018.** ABA accumulation in dehydrating leaves is associated  
883 with decline in cell volume, not turgor pressure. *Plant Physiology* **176**: 489–493.  
884
- 885 **Schneider JV, Habersetzer J, Rabenstein R, Wesenberg J, Wesche K, Zizka G. 2017.** Water  
886 supply and demand remain coordinated during breakdown of the global scaling relationship  
887 between leaf size and major vein density. *New Phytologist* **214**: 473–486.  
888
- 889 **Scoffoni C, Rawls M, McKown A, Cochard H, Sack L. 2011.** Decline of leaf hydraulic  
890 conductance with dehydration: relationship to leaf size and venation architecture. *Plant*  
891 *Physiology* **156**: 832–843.  
892
- 893 **Sellin A, Öunapuu E, Kaurilind E, Alber M. 2012.** Size-dependent variability of leaf and  
894 shoot hydraulic conductance in silver birch. *Trees* **26**: 821–831.  
895

- 896 **Skiryecz A, Claeys H, De Bodt S, Oikawa A, Shinoda S, Andriankaja M, Maleux K, Eloy**  
897 **NB, Coppens F, Yoo S-D, et al. 2011.** Pause-and-stop: the effects of osmotic stress on cell  
898 proliferation during early leaf development in *Arabidopsis* and a role for ethylene signaling in  
899 cell cycle arrest. *The Plant Cell* **23**: 1876–1888.
- 900
- 901 **Silva EC, Nogueira RJMC, Vale FHA, de Araújo FP, Pimenta MA. 2009.** Stomatal changes  
902 induced by intermittent drought in four umbu tree genotypes. *Brazilian Journal of Plant*  
903 *Physiology* **21**: 33–42.
- 904
- 905 **Sobrado MA. 2007.** Relationship of water transport to anatomical features in the mangrove  
906 *Laguncularia racemosa* grown under contrasting salinities. *New Phytologist* **173**: 584–591.
- 907
- 908 **Spence RD, Wu H, Sharpe PJH, Clark KG. 1986.** Water stress effects on guard cell anatomy  
909 and the mechanical advantage of the epidermal cells. *Plant, Cell and Environment* **9**: 197–202.
- 910
- 911 **Syvertsen JP, Lloyd J, McConchie C, Kriedemann PE, Farquhar GD. 1995.** On the  
912 relationship between leaf anatomy and CO<sub>2</sub> diffusion through the mesophyll of hypostomatous  
913 leaves. *Plant, Cell and Environment* **18**: 149–157.
- 914
- 915 **Tabata A, Ono K, Sumida A, Hara T. 2010.** Effects of soil water conditions on the  
916 morphology, phenology, and photosynthesis of *Betula ermanii* in the boreal forest. *Ecology*  
917 *Research* **25**: 823–835.
- 918
- 919 **Tipton JL, White M. 1995.** Differences in leaf cuticle structure and efficacy among Eastern  
920 redbud and Mexican redbud phenotypes. *Journal of the American Society for Horticultural*  
921 *Science* **120**: 59–64.
- 922
- 923 **Tognetti R, Johnson JD, Michelozzi M. 1995.** The response of European beech (*Fagus*  
924 *sylvatica* L.) seedlings from two Italian populations to drought and recovery. *Trees* **9**: 348–354.
- 925

- 926 **Torre S, Fjeld T, Gislerød HR, Moe R. 2003.** Leaf anatomy and stomatal morphology of  
927 greenhouse roses grown at moderate or high air humidity. *Journal of the American Society of*  
928 *Horticultural Science* **128**: 598–602.
- 929
- 930 **Toscano S, Ferrante A, Tribulato A, Romano D. 2018.** Leaf physiological and anatomical  
931 responses of Lantana and Ligustrum species under different water availability. *Plant Physiology*  
932 *and Biochemistry* **127**: 380–392.
- 933
- 934 **Tripathi P, Rabara RC, Reese RN, Miller MA, Rohila JS, Subramanian S, Shen QJ,**  
935 **Morandi D, Bücking H, Shulaev V, et al. 2016.** A toolbox of genes, proteins, metabolites and  
936 promoters for improving drought tolerance in soybean includes the metabolite coumestrol and  
937 stomatal development genes. *BMC Genomics* **17**: 102.
- 938
- 939 **Tschapinski TJ, Stewart DB, Norby RJ. 1995.** Interactions between drought and elevated CO<sub>2</sub>  
940 on osmotic adjustment and solute concentrations of tree seedlings. *New Phytologist* **131**: 169–  
941 177.
- 942
- 943 **Uhl D, Mosbrugger V. 1999.** Leaf venation density as a climate and environmental proxy: a  
944 critical review and new data. *Palaeogeography, Palaeoclimatology, Palaeoecology* **149**: 15–26.
- 945
- 946 **Vieira EA, Silva MdG, Moro CF, Laura VA. 2017.** Physiological and biochemical changes  
947 attenuate the effects of drought on the Cerrado species *Vatairea macrocarpa* (Benth.) Ducke.  
948 *Plant Physiology and Biochemistry* **115**: 472–483.
- 949
- 950 **Viger M, Smith HK, Cohen D, Dewoody J, Trewin H, Steenackers M, Bastien C, Taylor G.**  
951 **2016.** Adaptive mechanisms and genomic plasticity for drought tolerance identified in European  
952 black poplar (*Populus nigra* L.). *Tree Physiology* **36**: 909–928.
- 953
- 954 **Wang Z, Stutte GW. 1992.** The role of carbohydrates in active osmotic adjustment in apple  
955 under water stress. *Journal of the American Society for Horticultural Science* **117**: 816–823.
- 956



- 957 **Woodall GS, Dodd IC, Stewart GR. 1998.** Contrasting leaf development within the genus  
958 *Syzygium*. *Journal of Experimental Botany* **49**: 79–87.
- 959
- 960 **Woodward FI. 1987.** Stomatal numbers are sensitive to increases in CO<sub>2</sub> from pre-industrial  
961 levels. *Nature* **327**: 617–618.
- 962
- 963 **Wu Z, Dijkstra P, Koch GW, Peñuelas J, Hungate BA. 2011.** Responses of terrestrial  
964 ecosystems to temperature and precipitation change: a meta-analysis of experimental  
965 manipulation. *Global Change Biology* **17**: 927–942.
- 966
- 967 **Yoo CY, Mano N, Finkler A, Weng H, Day IS, Reddy ASN, Poovaiah BW, Fromm H,**  
968 **Hasegawa PM, Mickelbart MV. 2019.** A Ca<sup>2+</sup>/CaM-regulated transcriptional switch modulates  
969 stomatal development in response to water deficit. *Scientific Reports* **9**: 12282.
- 970
- 971 **Yoo CY, Pence HE, Jin JB, Miura K, Gosney MJ, Hasegawa PM, Mickelbart MV. 2010.**  
972 The *Arabidopsis* GTL1 transcription factor regulates water use efficiency and drought tolerance  
973 by modulating stomatal density via transrepression of *SDD1*. *The Plant Cell* **22**: 4128–4141.
- 974
- 975 **Zhang S-B, Guan Z-J, Sun M, Zhang J-J, Cao K-F, Hu H. 2012.** Evolutionary association of  
976 stomatal traits with leaf vein density in *Paphiopedilum*, Orchidaceae. *PLoS One* **7**: e40080.
- 977
- 978 **Zhao W-L, Chen Y-J, Brodribb TJ, Cao K-F. 2016.** Weak co-ordination between vein and  
979 stomatal densities in 105 angiosperm tree species along altitudinal gradients in Southwest China.  
980 *Functional Plant Biology* **43**: 1126–1133.

981 **Figure Legends**

982

983 **Main Tables and Figures**

984

985 **Fig. 1.** Plasticity of stomatal density (a), stomatal index (b), stomatal size (c), and stomatal pore  
986 index (d) following growth in containers with media water content (MWC) representing mild  
987 (60% MWC, black symbols) or severe (40%, red symbols) water stress (WS). Plasticity was  
988 calculated as the ln response ratio. Data is presented for the pooled second through fourth leaves  
989 that developed under 60% MWC ( $n = 4-6$ ) and the first leaf that developed under 40% MWC ( $n$   
990  $= 6-8$ ). Error bars represent 95% confidence intervals. WS plants are significantly different from  
991 well-watered plants if bars do not overlap 0.

992

993 **Fig. 2.** Plasticity of theoretical maximum stomatal conductance (a) following growth in  
994 containers with media water content (MWC) representing mild (60% MWC, black symbols) or  
995 severe (40%, red symbols) water stress (WS). Plasticity was calculated as the ln response ratio.  
996 Data is presented for the pooled third and fourth leaves that developed under 60% MWC ( $n = 4-$   
997  $6$ ) and the first leaf that developed under 40% MWC ( $n = 6-8$ ). Error bars represent 95%  
998 confidence intervals. WS plants are significantly different from well-watered plants if bars do not  
999 overlap 0. Data for individual leaves (b-d) are means  $\pm$  SE, and \* or \*\* denote a significant  
1000 difference between well-watered (WW) and WS leaves at  $P < 0.05$  or  $0.01$ , respectively, based  
1001 on one-way ANOVA ( $n = 4-6$  for 60% MWC,  $n = 6-8$  for 40% MWC).

1002

1003 **Fig. 3.** Plasticity of vein density following growth in containers with media water content  
1004 (MWC) representing mild (60% MWC, black symbols) or severe (40%, red symbols) water  
1005 stress (WS). Plasticity was calculated as the ln response ratio. Data is presented for the pooled  
1006 third and fourth leaves that developed under 60% MWC ( $n = 4-6$ ) and the first leaf that  
1007 developed under 40% MWC ( $n = 6-8$ ). Error bars represent 95% confidence intervals. WS plants  
1008 are significantly different from well-watered plants if bars do not overlap 0.

1009

1010 **Fig. 4.** Stomatal conductance (a-c) and net CO<sub>2</sub> assimilation (d-f) of leaves that developed under  
1011 well-watered (WW, circles) or water-stress (WS, triangles) conditions (60% MWC) or

1012 conditions. Background shading represents maintained MWC treatments over time (light grey)  
1013 and re-irrigation (white). Leaf 3 was used for day 61 measurements and leaf 4 for all other  
1014 measurements (see Fig. S3). Data are means  $\pm$  standard error (SE). Open symbols indicate a  
1015 significant difference between WS and WW plants at  $P < 0.05$ , based on a one-factor ANOVA ( $n$   
1016 = 4–6).

1017

1018 **Fig. 5.** Schematic of the changes in stomatal anatomy observed in different tree species subjected  
1019 to 60 or 40% MWC water deficit. The common outcome of changes in density (redbud, 60%  
1020 MWC) or size (birch, 60% MWC; redbud, 40% MWC) was a reduction in the total stomatal area  
1021 of water-stressed leaves, such that stomatal conductance was reduced. This outcome was also  
1022 achieved in WS maple, albeit by stomatal closure instead of stomatal development plasticity.

1023

## 1024 **Supporting information**

1025

1026 **Figure S1.** Environmental conditions throughout the experiment.

1027 **Figure S2.** Media water content throughout the experiment.

1028 **Figure S3.** Schematic of leaves used for data collection in the 60% MWC treatment.

1029 **Table S1.** Description of measurements made on different leaves during both experiments.

1030 **Figure S4.** Leaf growth dynamics in the 60% MWC treatment.

1031 **Figure S5.** Plasticity of tree height and leaf area in both experiments.

1032 **Figure S6.** Height of trees after both treatments of WS.

1033 **Figure S7.** Leaf area of individual leaves after both WS treatments.

1034 **Figure S8.** Relative water content of individual leaves in both WS treatments.

1035 **Figure S9.** Leaf osmotic potential and osmotic potential at full turgor after both WS treatments.

1036 **Figure S10.** Specific leaf weight of leaves after both WS experiments.

1037 **Figure S11.** Stomatal density of individual leaves after both experiments.

1038 **Figure S12.** Stomatal index of individual leaves after both experiments.

1039 **Figure S13.** Stomatal size of individual leaves after both experiments.

1040 **Figure S14.** Stomatal length and width of individual leaves after both experiments.

1041 **Figure S15.** Collected plasticity and individual leaf pavement cell size after both experiments.

- 1042 **Figure S16.** Collected plasticity and individual leaf pavement cell density after both  
1043 experiments.
- 1044 **Figure S17.** Stomatal pore index of individual leaves after both WS experiments.
- 1045 **Figure S18.** Vein density in leaves 3 and 4 measured after development under well-watered or  
1046 water-stressed (WS, 60 or 40% MWC) conditions.
- 1047 **Figure S19.** Transpiration rate and whole-leaf transpiration in leaves during and after the 60%  
1048 MWC water deficit.
- 1049 **Figure S20.** Stomatal conductance, net CO<sub>2</sub> assimilation, transpiration rate, and whole-leaf  
1050 transpiration during the 40% MWC water deficit.
- 1051 **Figure S21.** The relationship between stomatal pore index and stomatal size, density, and index  
1052 across both experiments.
- 1053 **Figure S22.** Relationship between pavement cell size and stomatal size across both experiments.
- 1054 **Figure S23.** Relationship between relative water content and stomatal traits across both  
1055 experiments.
- 1056 **Figure S24.** Relationship between stomatal and vein density across both experiments.
- 1057 **Figure S25.** Relationship between stomatal index and gas exchange across both experiments.
- 1058 **Figure S26.** Changes in stomatal conductance as a % of  $g_{smax}$  in the fourth leaf that developed  
1059 under water-stressed conditions (60% MWC), along with well-watered controls over time.
- 1060 **Figure S27.** Relationship between stomatal pore index and degree of stomatal closure in WS  
1061 plants.

Stomatal trait plasticity

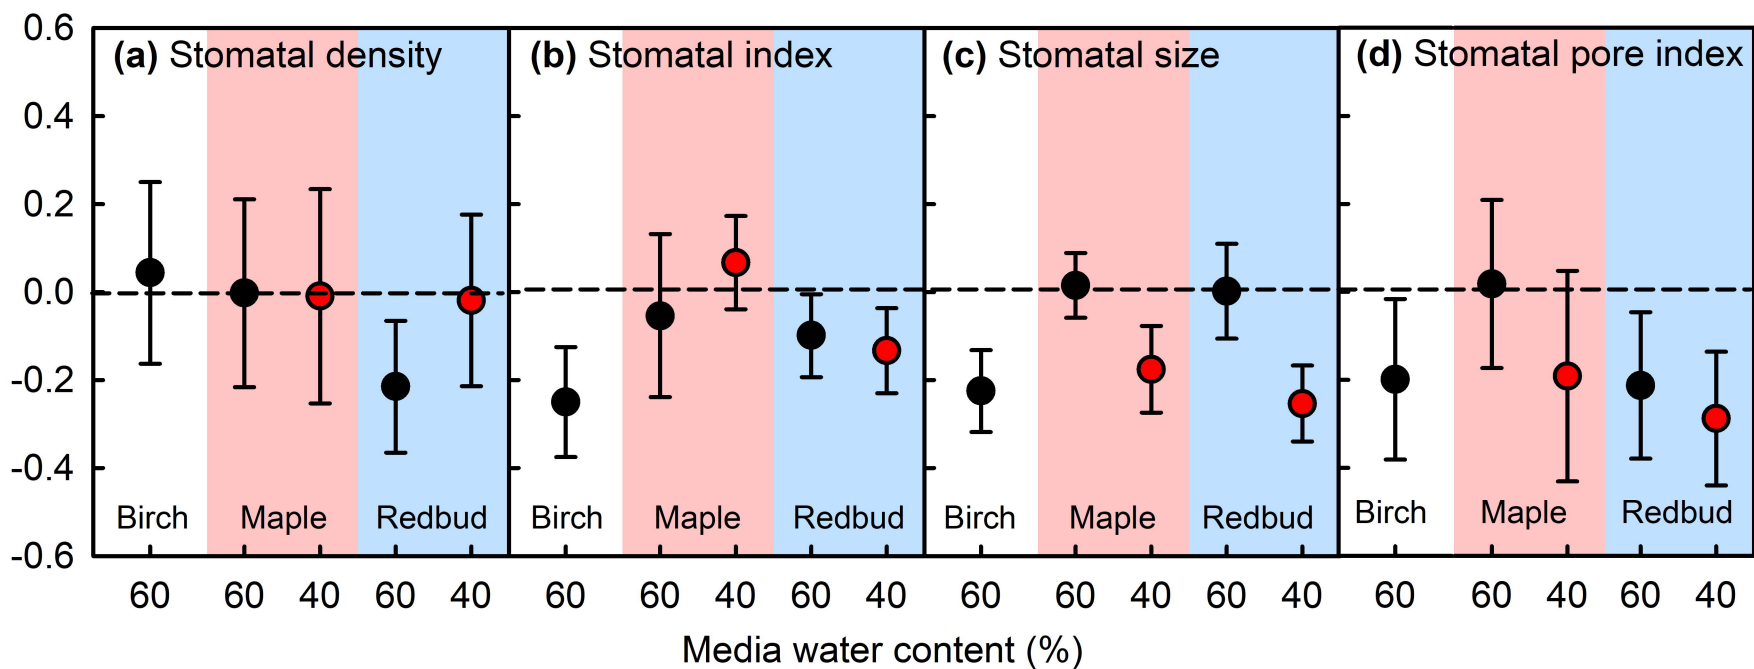

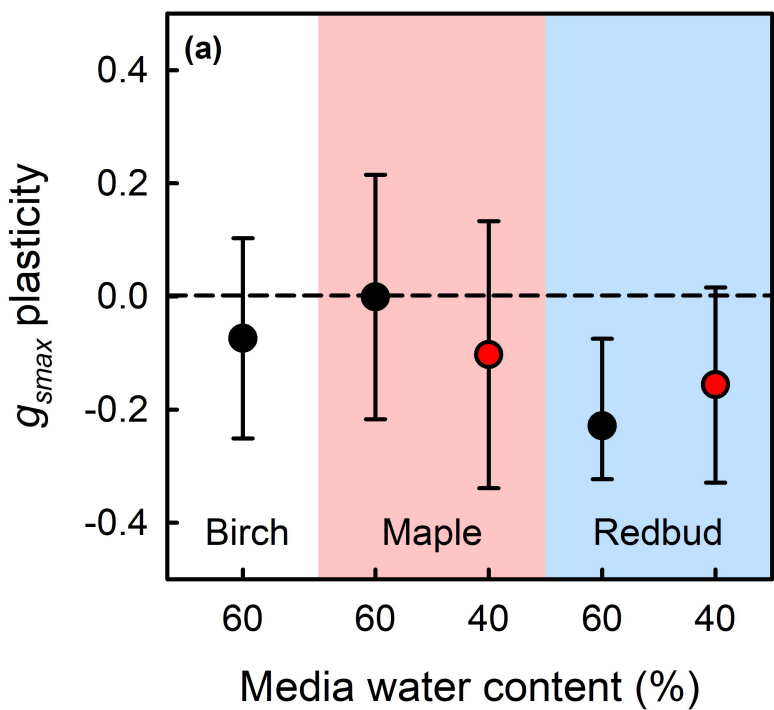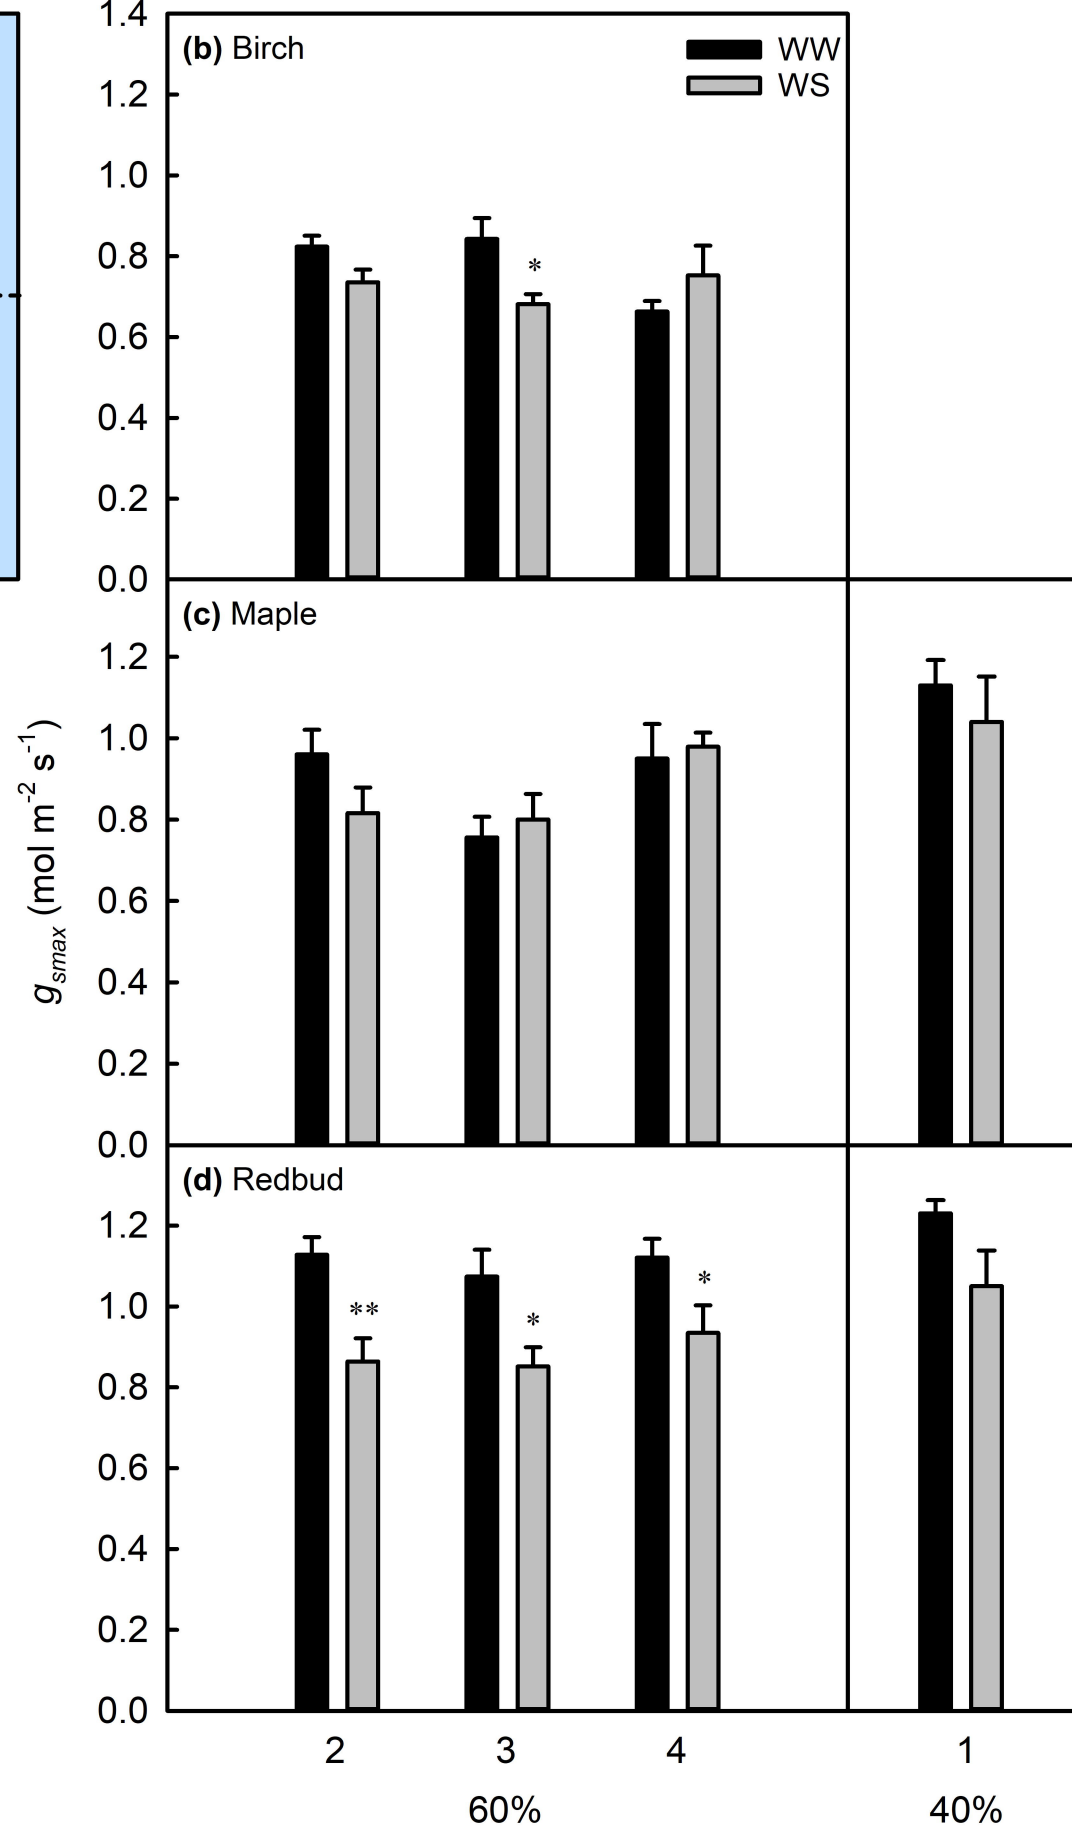

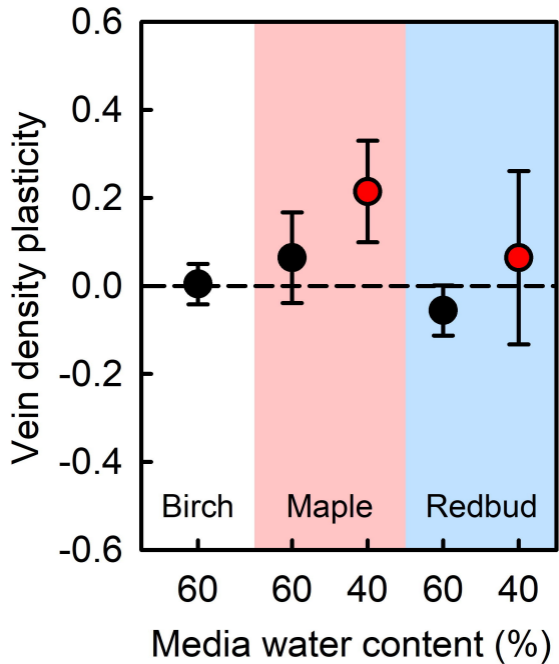

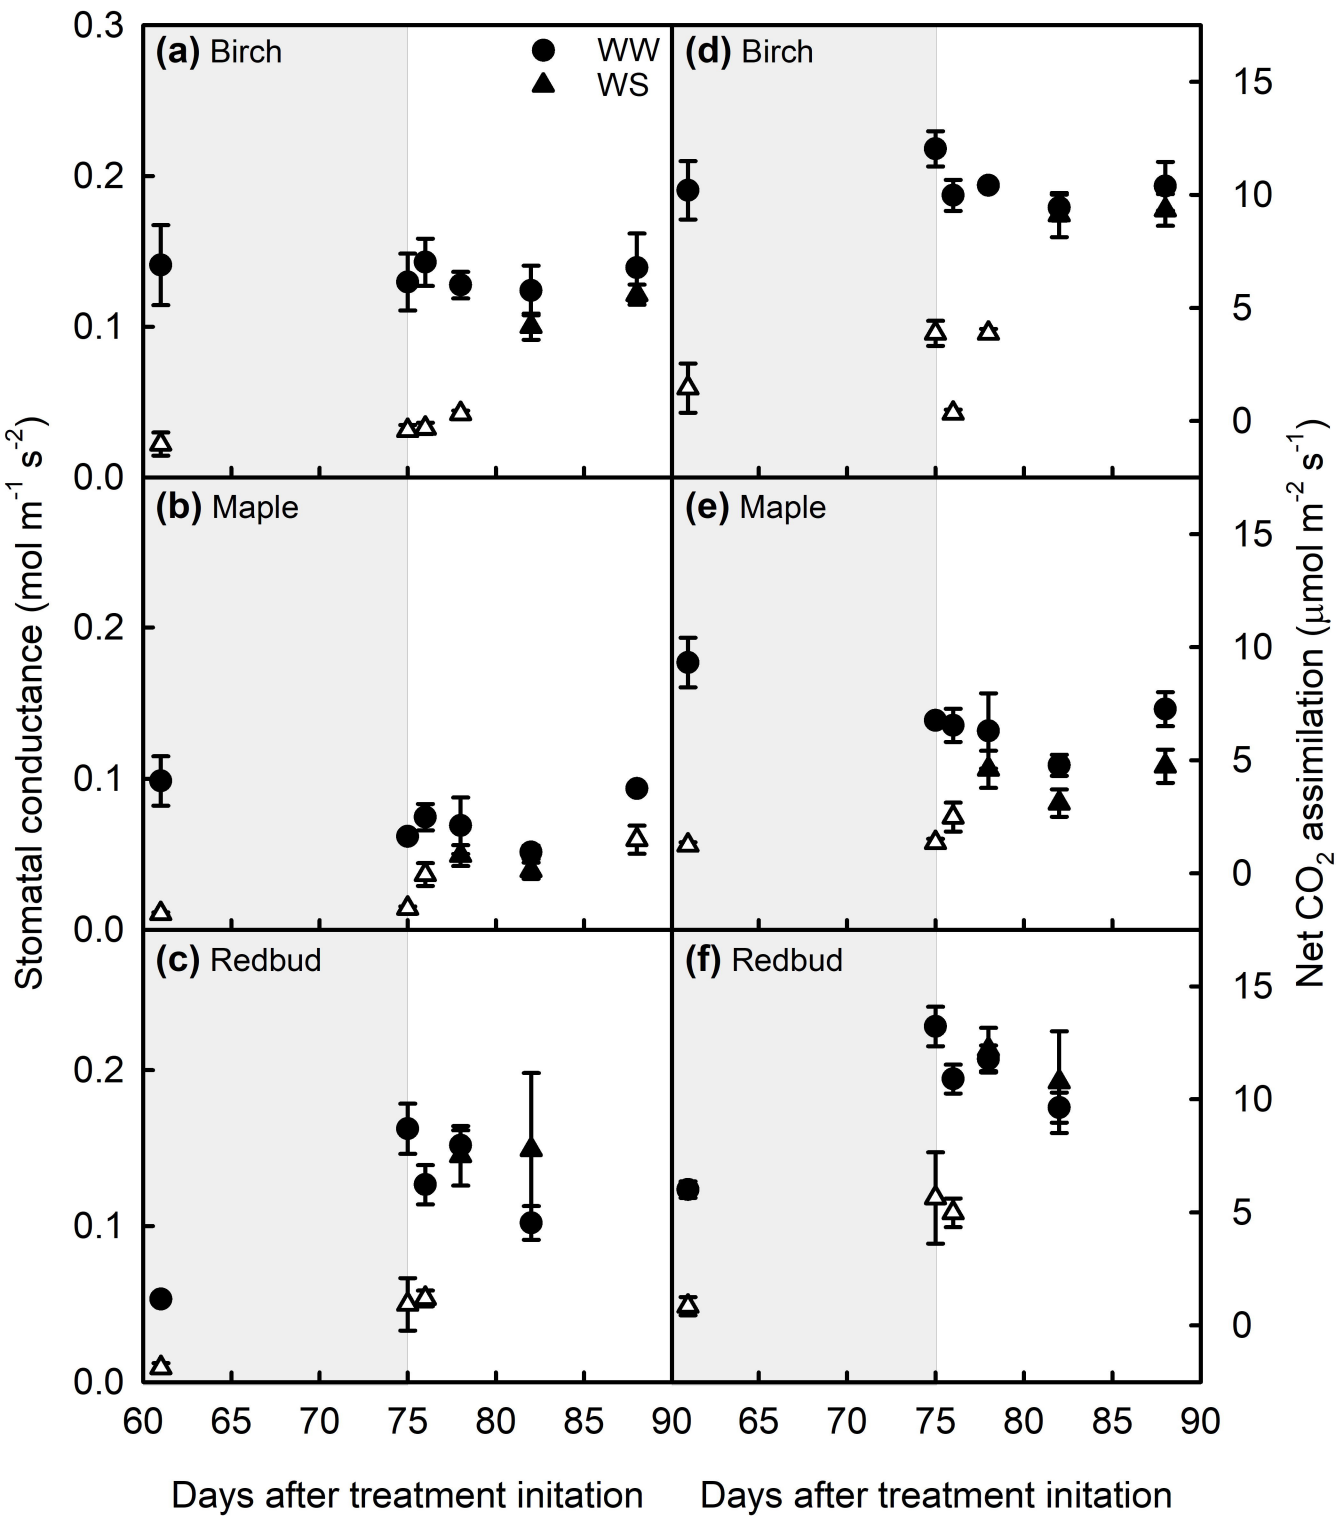



## Stomatal closure

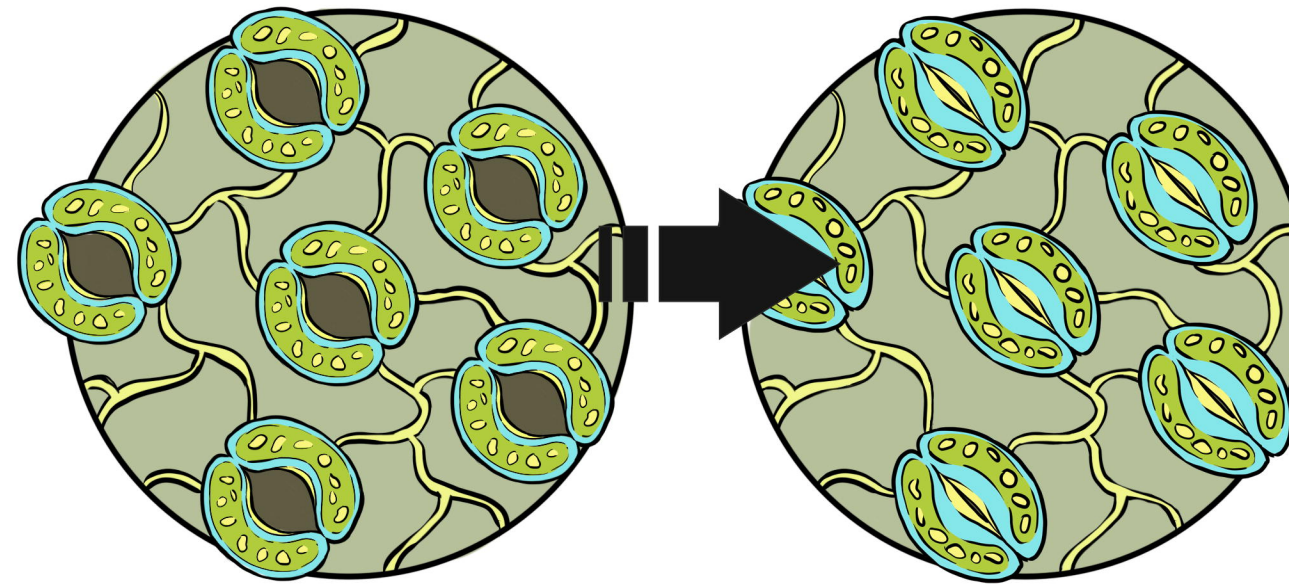

## Physiological

## Fewer stomata

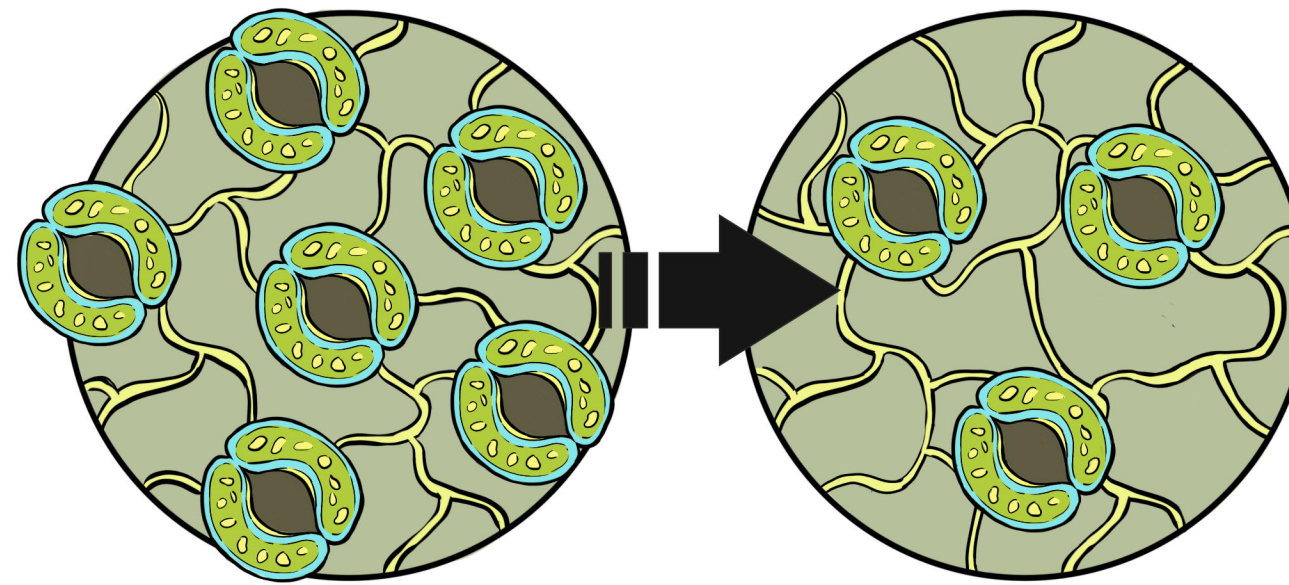

## Smaller stomata

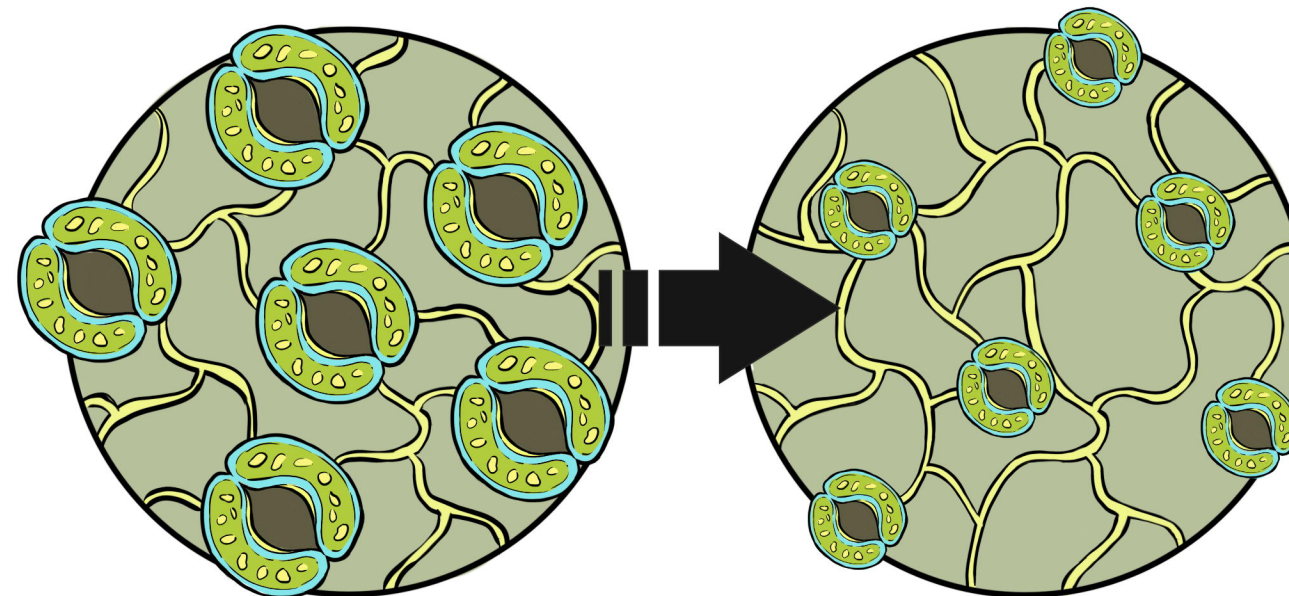

Lower stomatal  
conductance and  
water loss

Lower stomatal  
pore index

Water stress

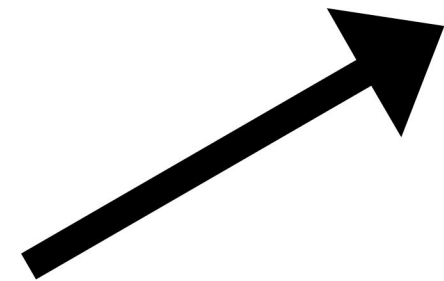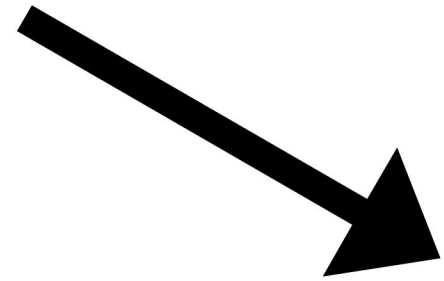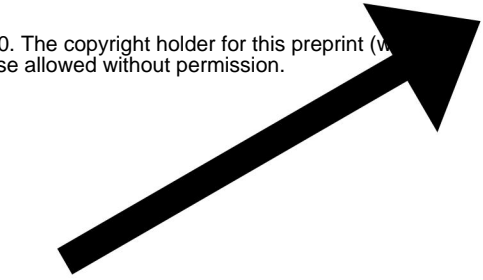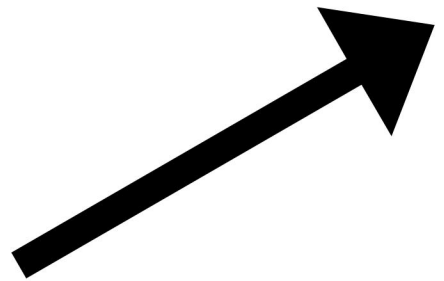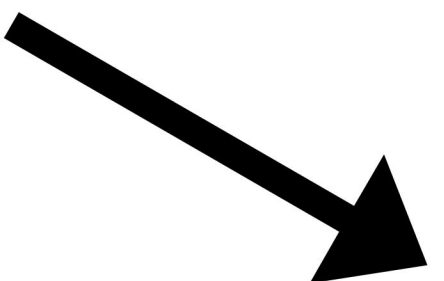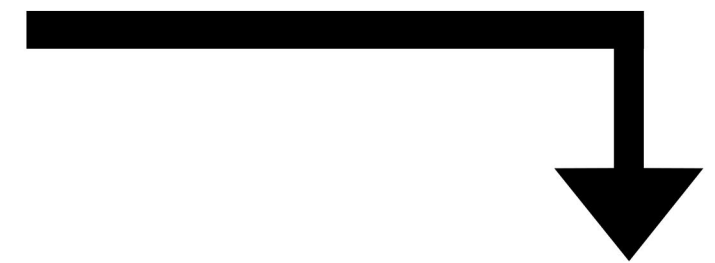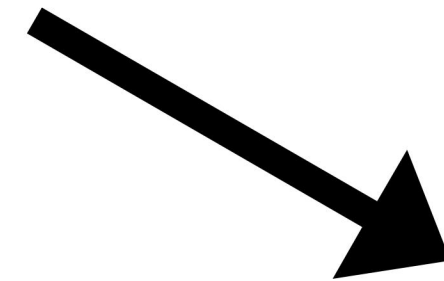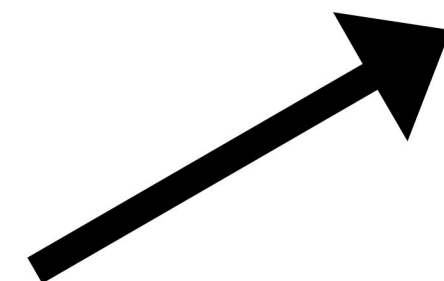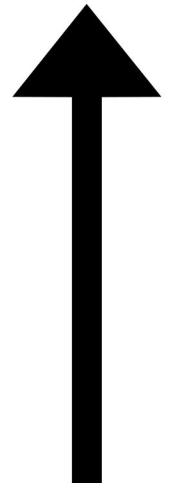

Source: https://www.biorxiv.org/content/10.1101/2020.07.07.191817v1.full.pdf
